1 Functional characterization of 5' UTR *cis*-acting sequence elements that modulate translational  
2 efficiency in *P. falciparum* and humans

3

4 Valentina E. Garcia<sup>1</sup>, Rebekah Dial<sup>1,2</sup>, Joseph L. DeRisi\*<sup>1,3</sup>

5 <sup>1</sup>Univeristy of California, San Francisco, <sup>2</sup>Denali Therapeutics, <sup>3</sup>Chan Zuckerberg Biohub

6 \*Corresponding Author

7 **Abstract**

8 **Background**

9 The eukaryotic parasite *Plasmodium falciparum* causes millions of malarial infections  
10 annually while drug resistance to common antimalarials is further confounding eradication  
11 efforts. Translation is an attractive therapeutic target that will benefit from a deeper  
12 mechanistic understanding. As the rate limiting step of translation, initiation is a primary driver  
13 of translational efficiency. It is a complex process regulated by both *cis* and *trans* acting factors,  
14 providing numerous potential targets. Relative to model organisms and humans, *P. falciparum*  
15 mRNAs feature unusual 5' untranslated regions suggesting *cis*-acting sequence complexity in  
16 this parasite may act to tune levels of protein synthesis through their effects on translational  
17 efficiency.

18 **Methods**

19 Here, we deployed *in vitro* translation to compare the role of *cis*-acting regulatory  
20 sequences in *P. falciparum* and humans. Using parasite mRNAs with high or low translational  
21 efficiency, the presence, position, and termination status of upstream "AUG"s, in addition to  
22 the base composition of the 5' untranslated regions, were characterized.

23 **Results**

24           The density of upstream “AUG”s differed significantly among the most and least  
25   efficiently translated genes in *P. falciparum*, as did the average “GC” content of the 5’  
26   untranslated regions. Using exemplars from highly translated and poorly translated mRNAs,  
27   multiple putative upstream elements were interrogated for impact on translational efficiency.  
28   Upstream “AUG”s were found to repress translation to varying degrees, depending on their  
29   position and context, while combinations of upstream “AUG”s had nonadditive effects. The  
30   base composition of the 5’ untranslated regions also impacted translation, but to a lesser  
31   degree. Surprisingly, the effects of *cis*-acting sequences were remarkably conserved between *P.*  
32   *falciparum* and humans.

### 33   **Conclusion**

34           While translational regulation is inherently complex, this work contributes toward a  
35   more comprehensive understanding of parasite and human translational regulation by  
36   examining the impact of discrete *cis*-acting features, acting alone or in context.

### 37   **Keywords**

38   *In vitro* translation, translation initiation, upstream “AUG”s, upstream open reading frames

### 39   **Background**

40           As the primary cause of severe malaria, *Plasmodium falciparum* remains a major global  
41   health threat. In 2018, approximately 228 million cases of malaria led to 405,000 deaths,  
42   primarily of children under the age of 5 [1]. Control and eradication of *P. falciparum* is  
43   complicated by widespread or emerging drug resistance to all common antimalarial drugs [2–  
44   4]. To circumvent drug resistance, targeted therapeutic development has the potential to  
45   generate novel antimalarials with unique mechanisms of action. Unfortunately, targeted

46 development is hindered by an incomplete understanding of the basic molecular processes of  
47 *P. falciparum* and how they differ from human biology.

48  
49         Recently, translation has emerged as a potentially druggable pathway [5–7]. While no  
50 clinically approved antimalarials target cytoplasmic translation [5], there are promising new  
51 candidates to distinct translational mechanisms. For example, there is a growing number of  
52 compounds targeting tRNA synthetases [8,9], M5717 (formerly DDD107498) is currently in  
53 human trials and inhibits eukaryotic elongation factor 2 [6,8], and MMV008270 has been shown  
54 to selectively inhibit parasite translation through an unknown mechanism of action [10].  
55 Currently no candidates are known to target translation initiation.

56  
57         Eukaryotic translation initiation determines the rate of translation of a given mRNA,  
58 referred to as the translational efficiency (TE) [11,12]. Initiation at the proper translation start  
59 site (typically an “AUG” start codon) relies on interactions between the start codon and the  
60 local sequence context (the Kozak sequence) with the initiator Met-tRNA and other initiation  
61 factors [13–15]. TE can additionally be regulated by *cis*-acting sequence elements throughout  
62 the 5’ untranslated region (5’ UTR), the sequence preceding the translation start site. In  
63 particular, upstream “AUG”s (uAUGs) are commonly observed regulatory features that are  
64 divided into two groups: those that initiate open reading frames that extend beyond the  
65 translation initiation site, and those that are terminated, meaning they form upstream open  
66 reading frames (uORFs) by having an in-frame stop site preceding the protein coding region  
67 [16–18]. These *cis*-acting regulatory elements lower TE through many potential mechanisms

68 including by initiating translation out of frame from the downstream ORF, by adding long amino  
69 acid extensions at the N-terminus, or by sequestering ribosomes within the 5' UTRs [19–21].

70 A well-documented example of uAUG/uORF driven regulation is GCN4 in *Saccharomyces*  
71 *cerevisiae*. The 5' UTR of GCN4 contains four short uORFs that themselves are differentially  
72 translated under conditions of stress. Based on the availability of translation initiation factors,  
73 the uORFs modulate the translation rate of the primary protein coding region to fit the  
74 organisms current nutrient conditions [22,23]. While this example is deeply understood, it is  
75 not broadly generalizable, and the rules by which such sequences exert influence on TE remain  
76 challenging to describe even for the most studied of eukaryotes. For example, numerous  
77 variables have been identified in other contexts that modulate the effect of uAUGs and uORFs,  
78 including the Kozak sequence of the uAUG itself and the reading frame relative to the  
79 translational start site [19,24].

80 Studies of *P. falciparum* have confirmed that it possesses the expected eukaryotic cap-  
81 binding factors required for cap-dependent translation initiation [25,26]. Additionally, gene  
82 specific studies show that uAUGs and uORFs can repress translation in *P. falciparum* and that  
83 the Kozak sequence of uAUGs along with uORF length may modulate their effect on TE [27,28].  
84 This is particularly intriguing since *P. falciparum* has repeatedly been shown to have unusually  
85 long 5' UTRs containing many uAUGs [18,29,30]. Together this suggests that multiple *cis*-acting  
86 factors within the 5' UTRs of *P. falciparum* could act broadly to tune TE throughout the normal  
87 lifecycle, as opposed to regulating specific genes under extreme conditions, such as with GCN4  
88 regulation. However, extensive ribosome profiling from our lab revealed that transcription and  
89 translation rates are highly correlated throughout the intraerythrocytic life cycle with less than

90 10% of the transcriptome being under significant translational control [18]. Ribosome profiling  
91 also showed that the presence of uAUGs and uORFs did not appear to correlate with TE, which  
92 is in contrast to model organisms and classic paradigms like yeast GCN4. Together this  
93 highlights that it remains difficult to predict how *cis*-acting sequences within a given 5' UTR will  
94 affect TE, especially in disparate eukaryotic species.

95  
96 Here, we sought to understand the interconnected effects of 5' UTR *cis*-acting  
97 regulatory elements with respect to TE in both *P. falciparum* and human cells through a highly  
98 reductionist approach. To do so, we deployed an *in vitro* translation assay for *P. falciparum* and  
99 developed an equivalent assay for human K562 cells. Using a pair of naturally occurring *P.*  
100 *falciparum* 5' UTRs with differing TEs, the individual contributions of the sequence context,  
101 positionality, and termination status of uAUGs, along with the base composition of the 5' UTR  
102 to TE, were systematically dissected to understand their contributions, in isolation and in  
103 combination. Together these data present a complex portrait of interacting elements within 5'  
104 UTRs that directly influence TE, most of which are similar in both *P. falciparum* and human.

105

## 106 **Methods**

107

### 108 **Identifying characteristics associated with high and low TE from the 5' UTRs of *P. falciparum***

109

110 The ribosome profiling and mRNA sequencing data from the late trophozoite stage  
111 generated by Caro and Ahyong *et. al.* 2014 [18] were filtered for an abundance above 32 reads  
112 per million, a TE greater than zero, and a predicted 5' UTR length above 175 nucleotides.  
113 Additionally, 30 genes that are not included in the PlasmoDB-28 *P. falciparum* 3D7 gene

114 annotations were removed. This resulted in a data set containing 2088 genes (Additional File 1).  
115 The 5' UTR sequences were determined using the PlasmoDB-28 *P. falciparum* 3D7 genome.  
116 Sequence analysis was done using Python, K.S. tests were done using the Python SciPy package,  
117 and the data for Figure 1 was graphed using the Python Matplotlib package.

118

### 119 **Cloning length variations of PF3D7\_1411400 and PF3D7\_1428300 5' UTRs**

120 The first step to generating the constructs used here was to create a Puc118-NanoLuc  
121 construct without a 5' UTR (Additional File 2). Using In-fusion cloning the 5' UTR and firefly  
122 luciferase enzyme from the EBA175-Firefly plasmid used previously [5,10] were replaced with  
123 the NanoLuc Luciferase (Promega) coding sequence. The plasmid generated, called P16,  
124 consists of: Puc118 backbone with a T7 promoter proceeding the NanoLuc Luciferase protein  
125 coding sequence followed by the 3' UTR from PF\_HRP2.

126

127 To create the varying length 5' UTR constructs, the 5' UTR sequences of PF3D7\_1411400  
128 and PF3D7\_1428300 were amplified from *P. falciparum* W2 strain gDNA using Kapa 2G Robust  
129 DNA polymerase (Roche KK5024) with primers containing overhangs with the T7 promoter  
130 (forward primer) or NanoLuc (reverse primer). The P16 plasmid was amplified using Phusion  
131 polymerase (NEB M0530S) for the backbone (forward primer: ATGGTCTTCACACTCGAAGATTC,  
132 reverse primer: CCTATAGTGAGTCGTATTAGAATTCG). The inserts and backbone were purified  
133 using a Zymo DNA Clean and Concentrator-5 (Zymo Research D4013). In-fusion reactions were  
134 performed per the In-fusion Cloning Kit (Takara 638918) instructions and reactions were  
135 transformed into Stellar Competent Cells (Takara 636766).

136

### 137 **Cloning 5' UTR 130 nucleotide constructs**

138 To generate the 130 nucleotide 5' UTR constructs, long oligos containing an EcoRI-HF

139 cut site, the T7 promoter, the desired 5' UTR sequence, and a priming sequence to NanoLuc

140 were purchased from Integrated DNA Technologies (forward primer:

141 TGATTACGAATTCTAATACGACTCACTATAGG- desired 5' UTR - ATGGTCTTCACACTCGAAGATTTTC).

142 The P16 plasmid was used as a template for PCR using Kapa 2G Robust with the reverse primer

143 binding just after the BamHI-HF restriction site in Puc118 (reverse primer:

144 CTGCAGGTCGACTCTAGA). PCR products were run on a 1% agarose gel to check the product size

145 and purified using Zymo DNA Clean and Concentrator-5 (Zymo Research D4013). To create the

146 cloning insert, purified PCR product was digested with EcoRI-HF and BamHI-HF at 37°C for 1.5

147 hours and purified again using a Zymo DNA Clean and Concentrator-5 (Zymo Research D4013).

148 For the cloning backbone, P16 was digested with EcoRI-HF and BamHI-HF at room temperature

149 overnight (~12 hours), run on a 1% agarose gel, and gel extracted with the Zymoclean Gel DNA

150 Recovery Kit (Zymo Research D4008). The insert and backbone were ligated using T4 DNA ligase

151 (NEB M0202S) at room temperature for 30 mins and heat inactivated at 65°C for 10 mins. After

152 heat inactivation, the reaction was transformed into Stellar Competent Cells (Takara 636766).

153 All constructs were sequence verified. The sequences for all the 5' UTRs evaluated can be found

154 in Additional File 3.

155

### 156 **Generating reporter RNA for *in vitro* translation**

157 All mRNA generating plasmids were digested with PvuII-HF (NEB R[Δ4]151L) and ApaLI-  
158 HF (NEB R0507L) at 37°C for 3 hours. After digestion, templates were run on a 1% agarose gel to  
159 confirm cutting and the reactions were purified with Zymo DNA Clean and Concentrator-5  
160 (Zymo Research D4013). 1ug of linearized template was used in a 100uL T7 RNA Polymerase  
161 (purified in house) reaction that was incubated at 37°C for three hours. After T7 reactions were  
162 complete, 15uL TurboDNase (ThermoFisher Scientific AM2238) was added, and reactions were  
163 incubated at 37°C for 15 minutes. The RNA was then purified using a Zymo RNA Clean and  
164 Concentrator-25 Kit (Zymo Research R1017). Eluted RNA was measured using the Qubit RNA HS  
165 Assay Kit (Thermo Fisher Scientific Q32852) then capped following the protocol for the Vaccinia  
166 Capping System (NEB M2080S) and purified one last time using Zymo RNA Clean and  
167 Concentrator-5 (Zymo Research R1013). Capped RNA concentrations were measured using the  
168 Qubit RNA HS Assay Kit (Thermo Fisher Scientific Q32852). Final RNA was diluted to  
169 0.25pmoles/ul for use in the *in vitro* translation assays.

170 For the comparing capped veruses uncapped mRNA, uncapped RNA was incubated for 5  
171 minutes at 65°C to match the treatment of capped RNAs. The same RNA that was used in the  
172 vaccinia capping reaction was directly compared to the post-cap RNA.

173

#### 174 **Generating *P. falciparum* *in vitro* translation lysates**

175 *P. falciparum* W2 strain (MRA-157) from MR4 was grown in human erythrocytes at 2%  
176 hematocrit in RPMIc medium (RPMI 1640 media supplemented with 0.25% Albumax II  
177 (GIBCOLife Technologies), 2 g/L sodium bicarbonate, 0.1 mM hypoxanthine, 25 mM HEPES (pH



178 7.4), and 50µg/L gentamicin), at 37°C, 5%O<sub>2</sub>, and 5%CO<sub>2</sub>. Cultures were maintained at 2-5%  
179 parasitemia.

180  
181 In depth step-by-step protocols for lysate generation have been previously published  
182 [5]. In summary, cultures were synchronized twice using 5% sorbitol six hours apart. Once  
183 cultures recovered to 10% parasitemia, they were used to seed two 500mL hyperflasks (Corning  
184 10031). When cultures reached the late trophozoite stage at 10–20% parasitemia, the cultures  
185 were centrifuged for 5 min at 1500g at room temperature with no break, the supernatant was  
186 removed, and 0.025–0.05% final saponin (exact amount determined by optimization of each  
187 batch of saponin) in Buffer A (20 mM HEPES pH8.0, 2mM Mg(OAc)<sub>2</sub>, 120mM KOAc) was added.  
188 Saponin lysed cultures were centrifuged at 4°C at 10,000g for 10 min in a Beckman Coulter  
189 J26XPI. Pellets were washed twice with buffer A with centrifuging between each wash and then  
190 were re-suspended in an equal volume to the pellet of BufferB2 (20 mM HEPES pH8.0,100 mM  
191 KOAc, 0.75mMMg(OAC)<sub>2</sub>, 2mMDTT,20% glycerol,1XEDTA-free protease inhibitor cocktail  
192 (Roche)), flash frozen, and stored in -80°C. Frozen pellets were then thawed at 4°C and lysed by  
193 passing them through a cell homogenizer containing a 4µm-clearance ball bearing (Isobiotec,  
194 Germany) 20 times by hand or using a custom build machine [31]. The whole-cell lysate was  
195 then centrifuged at 4°C at 16,000g for 10 min and the supernatant was flash frozen and stored  
196 at -80°C. The experiments performed here used a pool of lysates from multiple different  
197 harvests that were each individually tested for a minimal activity of 10<sup>4</sup> using a high expression  
198 RNA containing NanoLuc (A[WT]) and the Promega Nano-Glo Luciferase assay system (Promega  
199 N1110). Pooled lysates were then optimized for the needed amount of Mg(OAc)<sub>2</sub> and an

200 optimal incubation time at 37°C, in this case 3mM final concentration Mg(OAc)<sub>2</sub> and 57  
201 minutes.

202

### 203 **Generating K562 *in vitro* translation lysates**

204 K562 suspension cells were cultured in RPMI 1640 media supplemented with 10% fetal  
205 bovine serum, 10mM HEPES (pH 7.2-7.5), and 0.5mg/mL Penicillin-Streptomycin-Glutamine.  
206 Cultures were maintained by splitting to 10<sup>5</sup> cells/mL and were counted using a BD Accuri.

207

208 When cells reached 10<sup>6</sup> cells/mL, the cultures were centrifuged for 5 min at 1500g at  
209 room temperature and the supernatant was removed. Pellets were washed twice with buffer A  
210 with centrifuging at 1500g at 4°C between each wash. Finally, pellets were re-suspended in an  
211 equal volume of Buffer B2 and flash frozen in liquid nitrogen. Cell lysates were generated from  
212 the frozen pellets using the same methodology as *P. falciparum* lysates, but with the cell  
213 homogenizer containing a 12 µm-clearance. Lysates that produced over 10<sup>4</sup> luminescence units  
214 using a high expression RNA containing NanoLuc Luciferase (A[WT]) and the Promega Nano-Glo  
215 Luciferase assay system (Promega N1110) in preliminary tests were pooled and optimized for  
216 the needed amount of Mg(OAc)<sub>2</sub> and incubation time using A[WT] mRNA, in this case 1.5mM  
217 final concentration Mg(OAc)<sub>2</sub> and 12 minutes.

218

### 219 ***In vitro* translation protocol**

220 *In vitro* translation reactions for *P. falciparum* and K562 lysates were set up identically.  
221 3uL of buffer B2 and 2uL of 0.25pmole/uL RNA were placed into 384-well plates. A master mix

222 of 3.5uL lysate with 0.5uL 100uM complete amino acid mix (Promega L4461) and 1uL 10x  
223 translation buffer (20mM Hepes pH 8, 75mM KoAc, 2mM DTT, 5mM ATP, 1mM GTP 200mM  
224 creatine phosphate, 2ug/ul Creatine kinase, and the pre-determined concentration for each  
225 lysate pool of Mg(OAc)) was added to each well. Reactions are then incubated for the pre-  
226 determined amount of time at 37°C, then placed on ice to stop the reactions. 8uL of reaction  
227 was mixed with 8uL of Nano-Glo buffer/substrate mix following the Nano-Glo Luciferase Assay  
228 System (Promega N1110) instructions. Luminescence was measured on a Promega GloMax  
229 Plate Reader (Promega TM297) with a 6 second integration time.

230

## 231 **Analysis**

232

### 233 Experimental TEs

234

235 All experiments were performed three separate times in triplicate, for a total of 9 values  
236 per mRNA tested (except for the capped and uncapped experiment which was done 3-4 times  
237 in duplicate). For each separate experiment, new mRNA was generated and capped. For the  
238 figures, each value was normalized to the mean of the triplicates from each separate run. All  
239 raw values and normalized values can be found in Additional File 4. The fold differences were  
240  $\log_2$  transformed and then used to calculate the mean and SEM. Graphs for the figures were  
241 made using a custom Python/Postscript script (Additional File 5).

242

### 243 Predicted activity of multiple uAUGs

244 The percent repression of each uAUG individually was calculated by determining the  
245 percent of R[ $\Delta 1:\Delta 2:\Delta 3:\Delta 4$ ] (the “maximum signal”). For the predictions, the percent repression  
246 of each uAUG in the model were multiplied together.

247

## 248 Predicted Secondary Structures

249 To evaluate for secondary structure, the  $\Delta G$  of 30 nucleotide stretches of the 5' UTR  
250 tiled with a 5 nucleotide separation was generated using RNAfold [32]. The predicted  $\Delta G$  were  
251 then plotted using GraphPad Prism Software.

252

## 253 Results

### 254 **Identifying putative *cis*-acting elements within the 5' UTRs of *P. falciparum* that differ** 255 **between genes with high and low TE**

256 To identify putative *cis*-acting sequences that regulate TE in *P. falciparum*, the ribosome  
257 profiling and mRNA sequencing data generated by Caro and Ah Yong *et. al.* [18] was re-analyzed  
258 by comparing the 5' UTR sequences of genes in the bottom 10% and top 10% of TEs during the  
259 late trophozoite stage (Figure 1A). Features within the 5' UTRs were quantified, and the  
260 distributions from each set were compared. While the distributions of 5' UTR length were not  
261 statistically distinct (K.S. test  $p=0.10$  Supplemental Figure 1A), the distributions of uAUG  
262 frequency differed significantly and appeared distinctly separated when normalized to 5' UTR  
263 length with lower TE genes tending to contain more uAUGs (K.S. test  $p=3.36*10^{-9}$  and  
264  $p=1.1*10^{-21}$  respectively) (Supplemental Figure 1B, Figure 1B) . This trend appeared to be most  
265 distinct closest to the protein coding region (Figure 1C).

266

267           Additionally, the distributions of GC content statistically differed between 5' UTRs with  
268 low and high TE (K.S. test  $p=2.24 \times 10^{-5}$ ) (Figure 1D). The positional effect followed a similar trend  
269 with repressed genes on average having a higher GC content, especially near the translational  
270 start site (Figure 1E). Together, this retrospective bioinformatic analysis suggested that these  
271 two features should be further investigated for their role in influencing TE with particular  
272 attention placed on the sequence region proximal to the translation start site.

273

274 **Evaluating *P. falciparum* and human K562 *in vitro* translation assays for measuring the effect**  
275 **of 5' UTRs on TE**

276           To investigate the role of *cis*-acting elements within 5' UTRs, an *in vitro* translation assay  
277 previously developed for identifying translation inhibitors against *P. falciparum* [5,10] was  
278 adapted using both *P. falciparum* W2 and *H. sapiens* K562 cellular extracts. To validate and  
279 optimize the platform for this purpose, two mRNAs transcribed in late trophozoites with  
280 significantly different TEs were identified, PF3D7\_1411400 (a plastid replication-repair enzyme)  
281 representing a translationally repressed mRNA from the bottom 10% of TEs and  
282 PF3D7\_1428300 (a proliferation-associated protein) representing a high translation mRNA from  
283 the top 10% of TEs. These two genes were chosen for their relatively similar 5' UTR lengths and  
284 other properties (Figure 2A and B). The full length 5' UTRs of both genes (Figure 2A) were  
285 cloned into a reporter construct driving expression of a luciferase enzyme and were evaluated  
286 for their effect on TE.

287

288           The 5' UTR of PF3D7\_1411400 is 730 nucleotides long, contains 15 uAUGs (13 form  
289 uORFs), and is 11.0% GC (Figure 2B). Using the data of Caro *et. al.* [18], the RNA abundance was  
290 measured to be 63.66 reads per million and the  $\log_2(\text{TE})$  was -1.94. The 5' UTR of  
291 PF3D7\_1428300 is 775 nucleotides long, contains 10 uAUGs (all of which form uORFs), and is  
292 9.3% GC (Figure 2B). The abundance for the RNA was measured to be 522.93 reads per million  
293 and the  $\log_2(\text{TE})$  was 1.75. Thus, the TE of the active gene is 12.2-fold higher than that of the  
294 repressed gene by ribosome profiling. In the *P. falciparum in vitro* translation assay, which  
295 effectively removes any influence from differential expression levels, the signal produced by the  
296 activating 5' UTR was 24.5-fold higher than the signal from the repressive 5' UTR (Figure 2B). In  
297 the K562 *in vitro* translation assay, the 5' UTR from the active gene also out-performed that of  
298 the repressed gene by 5.3-fold (Figure 2C). Both *in vitro* translation assays recapitulated the  
299 difference in TE that was observed *in vivo*, albeit with different absolute magnitudes.

300  
301           As noted above, the 5' UTR analysis of the ribosome profiling data suggested that  
302 differences between high and low TE 5' UTRs appeared to be exaggerated closer to the  
303 translation start site. To investigate this while reducing the search space for *cis*-acting elements,  
304 each of the 5' UTRs was progressively trimmed from the 5' end (Figure 2C). In *P. falciparum*  
305 lysates, shortening the activating 5' UTR to 549 nucleotides increased translation 4.2-fold, and  
306 reducing the UTR to 130 nucleotides further increased translation 1.9-fold, for a 7.9-fold total  
307 increase. Reducing the repressive 5' UTR to 339 nucleotides similarly increased translation 3.15-  
308 fold, but further reduction to 130 nucleotides resulted in no additional increases in *P.*  
309 *falciparum*. Similarly, in human K562 lysates, trimming of the 5' UTRs resulted in an overall

310 increase in translation for both 5' UTRs and increased the TE differential between the two  
311 (Figure 2B).

312  
313 While trimming both 5' UTRs increased their respective translation, the differential  
314 between the activating and repressive UTRs was magnified. At 130 nucleotides, the activating 5'  
315 UTR outperformed the repressive 5' UTR by 64-fold (Figure 2B), which had the added benefit of  
316 increasing the dynamic range between constructs. Hence forth, the minimal 130 nucleotide  
317 sequences were used as the platform for further dissection of *cis*-acting sequences and all  
318 subsequent 5' UTRs evaluated were 130 nucleotides. The activating 130 nucleotide 5' UTR  
319 derived from PF3D7\_1428300 is denoted as A[WT] and the repressive 130 nucleotide 5' UTR  
320 from PF3D7\_1411400 is denoted as R[WT]. Reflective of the distinct distributions in uAUG  
321 abundance and GC abundance, R[WT] is 16.9% GC and contains four uAUGs, numbered 1-4  
322 based on distance from the translation start site. uAUGs 1 and 2 do not form uORFs and are in  
323 the +1-frame relative to the reporter gene starting at -13 and -22 nucleotides, while uAUGs 3  
324 and 4 both form uORFs at -66 and -101 nucleotides. A[WT] is 7.7% GC and contains no  
325 upstream "AUG"s (Figure 2D).

326 All the RNAs used herein were capped using Vaccinia Capping Enzyme (NEB M2080S). To  
327 verify that both lysates were sensitive to capping, capped and uncapped versions of the full  
328 length 5' UTRs and the 130 nucleotide 5' UTRs were compared (Supplemental Figure 2). Both  
329 lysates were sensitive to capping, with capped RNAs generally generating more luminescence  
330 (up to a 21.7-fold increase in *P. falciparum* and 7.1 in K562 with full length 1429300), especially  
331 in *P. falciparum* lysates. Additionally, in K562 lysates, uncapped RNAs with the full length 5'

332 UTRs generated a more variable signal than capped RNAs. To promote scanning initiation,  
333 increase luminescence signal, and reduce noise, all further experiments in this study utilized  
334 capped RNA.

335 **Measurement of both independent and combined effects of uAUGs on translational**  
336 **repression**

337 The combined effect of the four uAUGs in R[WT] was first evaluated by mutating all four  
338 to “AUC”, denoted R[ $\Delta 1\Delta 2\Delta 3\Delta 4$ ]. Conversion of all four alleviated repression by over 1000% in  
339 *P. falciparum*, and 337% in human lysates (Figure 3A). If each uAUG equally contributed toward  
340 repression, the expected result of maintaining any single uAUG would be a consistent relief  
341 from repression relative to R[WT]. However, individually maintaining each of the four uAUGs  
342 yielded significantly different degrees of translation (Figure 3B), ranging from a modest 2-fold  
343 increase with uAUG-3 alone (R[ $\Delta 1\Delta 2\Delta 4$ ]) to a nearly 10-fold increase with uAUG-1 alone  
344 (R[ $\Delta 2\Delta 3\Delta 4$ ]), indicating unequal contributions towards the overall level of repression. For K562  
345 extracts, the results were similar, although uAUG-2 alone (R[ $\Delta 1\Delta 3\Delta 4$ ]) was the most repressive  
346 of the set, being even more so than the wild-type construct. Since uAUG-4 forms a uORF whose  
347 stop site overlaps with uAUG-3 and was eliminated by making uAUG-3 into “AUC”, uAUG-4 with  
348 a restored uORF was also evaluated (R [  $\Delta 1\Delta 2\Delta 3$ -uORF restored]). With the uORF restored,  
349 uAUG-4 confers minimal or no translational repression. These data demonstrate that each of  
350 the individual uAUGs in isolation possess differing repressive activities with respect to  
351 translation.

352



353 To further evaluate the repressive effects of uAUGs in a novel context, the four uAUGs  
354 from R[WT] were placed into A[WT] at the matching positions (Supplemental Figure 3). As  
355 expected, in *P. falciparum*, when all four uAUGs were present A[+1:+2:+3:+4], translation was  
356 repressed, 2.9-fold. Additionally, each uAUG individually repressed translation between 1.5-fold  
357 and 2.9-fold when the other positions were mutated to "AUC (Supplemental Figure 3). The  
358 results in K562 followed the same trends as *P. falciparum*.

359  
360 To explore potential interactions between uAUGs, pairwise combinations of the uAUGs  
361 in R[WT] were evaluated (Figure 3C). If uAUGs possess independent repressive potentials that  
362 do not affect each other, the repression by any two uAUGs would be the product of their  
363 respective potentials. For example, the two furthest uAUGs, uAUG-1 and uAUG-4, yielded 37%  
364 and 73% of the maximum translation of the derepressed construct R[Δ1Δ2Δ3Δ4] in *P.*  
365 *falciparum* lysates. Thus, if acting independently, the predicted yield for a 5' UTR containing  
366 both uAUGs would equal  $0.37 * 0.73$ , or 27%, of the maximum signal. The measured signal for  
367 this combination (R[Δ2Δ3]) was extremely close to the predicted value, 28.6%, suggesting that  
368 these two elements act independently and proportionately on translation. Evaluation of the  
369 remaining pairs of uAUGs revealed some notable combinations that likely highlight interacting  
370 pairs (Supplemental Figure 4). Of note, the predicted combination of uAUG-3 and uAUG-4  
371 (R[Δ1Δ2]) in *P. falciparum* underestimates the measured amount of translation (11% predicted  
372 versus 19% measured), suggesting an interaction between uAUG-4 and uAUG-3, which, as  
373 noted previously, marks the end of the uORF formed by uAUG-4. For K562 lysates, constructs

374 containing uAUG-2 differ most from their predicted values, indicating this element may be  
375 uniquely sensitive to the presence of the other uAUGs.

376  
377         Having examined all pair-wise combinations of the four uAUGs, each three-way  
378 combination was then evaluated (Figure 3D). Unlike the broad range of differing repressive  
379 activities observed for individual and pairwise uAUGs, trios of uAUGs all repressed translation  
380 to a similar or greater degree than R[WT]. Together these data indicated that uAUGs in isolation  
381 independently confer varying levels of repression; however, multiple uAUGs may combine to  
382 produce a concerted effect that was not predicted by their individual contributions.

383

#### 384 **Investigating the effect of position and termination status on uAUG repression**

385         Each of the uAUGs in R[WT] is distinct with respect to their Kozak context, their position  
386 relative to the translation start site, and their termination status. Previous work describing the  
387 Kozak context for *P. falciparum* suggests a string of adenosine bases preceding the start site is  
388 most commonly observed [28,33]. To assess the effects of uAUG positionality while maintaining  
389 a common Kozak, a cassette comprised of the -3 to +9 sequence from uAUG-3 was individually  
390 placed at five equally spaced positions within R[ $\Delta 1\Delta 2\Delta 3\Delta 4$ ] beginning at -14 nucleotides from  
391 the reporter protein coding region (Figure 4). All cassettes were inserted in the +2 frame such  
392 that if translation initiated at these sites, no reporter should be translated in-frame. Two  
393 versions of the cassette were created, one maintaining the termination with a stop codon at  
394 the end of the cassette and one without (Figure 4A/B). For the five constructs containing a non-  
395 terminating uAUG, all potential stop sites proceeding the protein coding region in-frame with

396 the 5' most cassette were eliminated and the effect of these mutations alone in the presence of  
397 uAUG-3 (R[Δ1Δ2Δ4]\*) were evaluated (Supplemental Figure 5A).

398

399       Except for the -122 position, where the uAUG is 11 nucleotides from the 5' cap, all  
400 cassette placements resulted in repression comparable to R[Δ1Δ2Δ4] (Figure 4C). Of note, the  
401 cassettes placed nearest to the 5' cap had little effect on translation in either *P. falciparum* or  
402 K562 lysates (1.2-fold and 1.3-fold repression respectively). For *P. falciparum*, unlike the  
403 relative consistency of repression produced by uORF placement, the uAUG equivalent yielded a  
404 trend in repression. As the uAUG moved closer to the translation start site the repressive  
405 strength increased until maximum repression was achieved when the cassette was placed -41  
406 nucleotides from the translation start site (Figure 4C). In comparison, K562 lysates also yielded  
407 peak repression at the -41 position, but the pattern of repression induced by both the uORF  
408 and uAUG cassettes were more similar to each other and the trend observed for uAUG  
409 cassettes in *P. falciparum*. These experiments indicate that in both *P. falciparum* and K562  
410 lysates, the position of uAUGs contributes in part to downstream repression, however,  
411 termination status may also impact this effect, at least in the case of *P. falciparum*.

412

### 413 **Evaluating the effect of GC content on TE**

414       One distinguishing feature of the *P. falciparum* genome is an extreme bias in nucleotide  
415 content, especially within the intergenic regions that are ~90% AT [34]. As noted in Figure 1D  
416 and 1E, there is a significant difference in the distributions of GC content between the 5' UTRs  
417 of genes with high and low TE with repressed genes exhibiting a higher GC bias. These

418 differences are evident within A[WT] and R[WT], which possess 7.7% GC, and 16.9% GC  
419 respectively. This GC bias is intensified in the 60 nucleotides closest to the translation start with  
420 A[WT] containing only 1.7% GC and R[WT] containing 15% GC (Figure 2D). To investigate the  
421 impact of GC content in the context of these two constructs, substitutions were systematically  
422 introduced into the proximal region of A[WT] to increase the GC content from 1.7% to a  
423 maximum of 30% GC (Figure 5A). Substitutions were maintained between constructs, no  
424 upstream “AUG”s were introduced, and significant secondary structures was avoided  
425 (Supplementary Figure 5). In *P. falciparum* lysates, between 1.7% and 20% GC there was no  
426 change in TE while at 30% GC translation was repressed 1.5-fold (Figure 5A). The repressive  
427 effect of the high GC content was 1.3-fold in human K562 lysates.

428  
429 The converse experiment of reducing the GC content of R[WT] was also carried out. The  
430 GC content in the last 60 nucleotides of R[ $\Delta$ 1 $\Delta$ 2 $\Delta$ 3 $\Delta$ 4] was reduced to 5% by eliminating all GC  
431 content between 4 and 60 nucleotides from the translation start site and to 0% by removing all  
432 GC (Figure 5B). A maximum translation increase of approximately 2-fold was observed relative  
433 to R[ $\Delta$ 1 $\Delta$ 2 $\Delta$ 3 $\Delta$ 4], indicating a modest but measurable impact in this context. These results were  
434 mirrored in K562 lysates (Figure 5B). Together, the result of manipulating the GC content of the  
435 last 60 nucleotides of the 5' UTR suggests that the impact on translation to be subtle, but  
436 sensitive to the overall context.

437

438 **Identifying additional *cis*-acting regulatory regions within R[WT] and A[WT]**

439 In addition to the study of specific elements predicted to impact TE, a series of  
440 systematic sequence swaps were investigated, in which regions from both the 5' and 3' end of  
441 R[WT] and A[WT] were exchanged. Beginning with the 3' end of the 5' UTR, 20, 40, and 60  
442 nucleotides were exchanged between R[WT] and A[WT] (Figure 6A and 6B). In the case of  
443 A[WT], introducing more sequence from R[WT] severely impacted TE. While some of this  
444 impact was anticipated due to the introduction of uAUG-1 and uAUG-2, additional decreases in  
445 translation were observed with sequence beyond these elements (A[60nt 3' R]). Furthermore,  
446 the added impact beyond the introduction of uAUGs was observed only with *P. falciparum*  
447 lysates. For the converse experiments, exchange of sequence from A[WT] into R[WT] at the 3'  
448 end resulted in increased translation (11.7-fold). This increase in translation was in part  
449 expected due to the elimination of uAUG-1 and uAUG-2, however the magnitude of the effect is  
450 greater than predicted from the experiments shown in Figure 3C. The effect in human K562  
451 lysates was markedly less with a maximum difference of 1.4-fold.

452 Sequence exchanges at the 5' end were similarly carried out using 10, 20, and 30  
453 nucleotide swaps between A[WT] and R[Δ1:Δ2:Δ3:Δ4]. The latter construct was chosen over  
454 R[WT] to assess the impact in the absence of uAUGs. For *P. falciparum*, exchanging the first 10  
455 nucleotides of R[Δ1:Δ2:Δ3:Δ4] into A[WT] repressed translation 2.6-fold, with a final 3.7-fold  
456 repression exchanging 30 nucleotides. (Figure 6C). In contrast, exchanging the first 10 and 20  
457 nucleotides of A[WT] into R[Δ1:Δ2:Δ3:Δ4] activated translation up to 1.9-fold while exchanging  
458 30 nucleotides activated translation 3.5-fold. Note that the level of translation achieved in this  
459 latter construct matches the output of A[WT], demonstrating that in the absence of uAUGs,

460 exchanging the sequence elements within the first 30 nucleotides of the 5' end of the 5' UTR  
461 was sufficient to render A[WT] and R[ $\Delta$ 1: $\Delta$ 2: $\Delta$ 3: $\Delta$ 4] approximately equivalent (Figure 6D).

462

## 463 **Discussion**

464 Among eukaryotes, *P. falciparum* presents several distinct features that bear upon  
465 translation. First, the AT-rich genome contains frequent poly-adenosine stretches that alone  
466 necessitates unique adaptations of the translational machinery to prevent ribosome stalling or  
467 frameshifting [35,36]. Additionally, there are a limited number of ribosomal RNA copies within  
468 the genome, each with stage specific expression [37,38]. The transcriptome also features  
469 unusually long 5' UTRs, the longest in late trophozoites being a remarkable 8229 nucleotides  
470 (PF3D7\_1139300). Despite these features, previous studies suggest that *P. falciparum* initiates  
471 translation in a cap-dependent manner similarly to other eukaryotes [39,40].

472

473 While the central initiation factors required for cap-binding have been bioinformatically  
474 identified and many of the essential interactions have been validated, questions remain around  
475 how these factors regulate translation initiation given *P. falciparum*'s unique 5' UTR features  
476 [26,41]. Additionally, ribosome profiling has demonstrated that translation is an integral point  
477 of regulation for model eukaryotes [42,43], but for *P. falciparum* it reveals that less than 10% of  
478 transcripts are translationally regulated. Directly evaluating how these unusual mRNA features  
479 function in *P. falciparum* could reveal unique mechanisms that would be powerful therapeutic  
480 targets.

481

482           A re-analysis of ribosome profiling data highlights two important features that differ  
483 between mRNAs at the top and bottom of the TE range. As shown in Figure 1, the presence of  
484 uAUGs and GC content are significantly different between highly translated and poorly  
485 translated mRNAs, a difference that appears exacerbated by proximity to the protein coding  
486 region. To explore and dissect the role of these features, two representative 5' UTRs were  
487 chosen from the top and bottom deciles, the 5' UTRs of PF3D7\_1411400 and PF3D7\_1428300.  
488 The differences in TE driven by these two 5' UTRs were faithfully recapitulated using *in vitro*  
489 translation extracts generated from late trophozoites of *P. falciparum* W2 strain (Figure 2) and  
490 human K562 cells. Surprisingly, these differences were maintained when using only the  
491 proximal 130 nucleotides from each 5' UTR, with A[WT] derived from PF3D7\_1428300 and  
492 R[WT] from PF3D7\_1411400. These two 130-nucleotide 5' UTRs provided an ideal platform to  
493 evaluate the effects of uAUGs and GC content.

494  
495           uAUGs have long been appreciated as translational regulatory elements, and work by  
496 Marilyn Kozak demonstrated their repressive abilities in the early 1980s [20]. However, it  
497 remains difficult to predict the individual or joint repressive activities of uAUGs from sequence  
498 context alone, especially for non-model organisms. Additionally, it is unusually to have uAUGs  
499 so abundant throughout the transcriptome. Here, a reductionist approach was used to  
500 individually assess the repressive potential of each uAUG within R[WT] in isolation, and in  
501 combination (Figure 3). For many pairs, such as uAUG-1 and uAUG-4, the combined activity  
502 directly reflected a combination of each uAUG's repressive strength. For others, like uAUG-3  
503 and uAUG-4, it was revealed that the combined effect of two uAUGs could be reduced by their

504 interaction. Since uAUG-3 is itself the in-frame stop site for uAUG-4, it reasonable to assume  
505 that the termination of uAUG-4 may interfere with initiation events at uAUG-3. These  
506 interactions make it difficult to predict the impact of multiple uAUGs without direct  
507 measurements as performed here.

508  
509         The sequence context surround an “AUG” is essential for determining the rate of  
510 initiation at that site [11,44,45], however, additional elements may affect the regulatory activity  
511 of an uAUG. Here, two possible modifiers were examined in detail, namely, the position of  
512 uAUGs relative to the protein coding region, and whether it forms a uORF (Figure 4). Both the  
513 position and termination status affect translation with the most dramatic result arising when  
514 the uAUG is positioned furthest from the protein coding region, only 11 nucleotides from the 5’  
515 cap. At this distance neither the open uAUG nor the uORF repressed translation. One caveat of  
516 this study is that only one putative uORF was assessed. It is likely that the length and  
517 composition of the uORF sequence itself may modify the overall impact.

518  
519         Along with uAUG frequency, bioinformatic analysis of the 5’ UTR sequences from *P.*  
520 *falciparum* also reveals a statistically significant difference in GC content, with higher GC  
521 content corresponding to lower TE. While higher GC content could correlate with higher  
522 secondary structures, we wanted to evaluate if GC content alone could regulate translation.  
523 Surprisingly, the results of manipulating GC content proximal to the protein coding region in the  
524 context of only these two chosen UTRs yielded corresponding changes in the predicted  
525 direction, albeit with small magnitudes when compared to the impact of uAUGs. In the active



526 context, translation became repressed relative to A[WT] at 30% GC content within 60  
527 nucleotides of the translational start. Within this 60-nucleotide region, only 31 (1.4%) of the  
528 2088 5' UTRs from *P. falciparum* expressed in late trophozoites evaluated here are 30% GC or  
529 above (Figure 1A). Thus, few genes would be predicted to be impacted by these shifts in GC  
530 content alone. Eliminating GC content from the last 60 nucleotides of R[ $\Delta$ 1: $\Delta$ 2: $\Delta$ 3: $\Delta$ 4] resulted  
531 in modest increases in TE (Figure 5B). In this case, of the 2088 5' UTRs 273 (13.1%) are 5% or  
532 below within this region and 16 (0.8%) are 0%.

533  
534 Finally, to examine the effects of the sequences within A[WT] and R[WT]/  
535 R[ $\Delta$ 1: $\Delta$ 2: $\Delta$ 3: $\Delta$ 4] on translation, segments from the 5' and 3' ends were progressively exchanged  
536 between them (Figure 6). Sequence exchanges at the 3' end of the 5' UTR removed or  
537 introduced uAUGs, which resulted in the expected increases or decreases in TE respectively. We  
538 note that in each case, exchanged sequence beyond the uAUGs also impacted TE in *P.*  
539 *falciparum*, suggesting additional context within these regions. Sequence exchanges at the 5'  
540 end were more impactful than would have been predicted. Specifically, 30 nucleotides of  
541 A[WT], when substituted into R[ $\Delta$ 1: $\Delta$ 2: $\Delta$ 3: $\Delta$ 4], suggest a possible sequence with a role in  
542 regulating the rate of translation initiation.

543  
544 As an essential pathway throughout the parasite's life cycle, protein synthesis is an  
545 attractive therapeutic target. However, since the mechanisms of eukaryotic translation are  
546 highly conserved, potential therapeutics must cross the challenging bar of being highly specific  
547 to *P. falciparum*. Here, *in vitro* translation was used to allow for direct comparison between *P.*

548 *falciparum* and human to identify unique effects on TE. Despite the large evolutionary distance  
549 between the two organisms, *P. falciparum* and K562 lysates yielded highly similar results in the  
550 context of the two short model UTRs used here. For developing therapeutics targeting  
551 translation initiation, avoiding host effects will be challenging, but *in vitro* translation can  
552 continue to be a valuable tool to directly measure differences between *Plasmodium* and  
553 humans [46].

554  
555 Finally, this work continues the task of uncovering the complexity of 5' UTR *cis*-acting  
556 regulatory elements and their impact on TE in eukaryotes. *In vitro* translation has previously  
557 revealed the importance of the Kozak consensus sequence and uAUGs in model eukaryotes,  
558 such as *Saccharomyces cerevisiae* and mammalian cultures [21,47–49], while higher throughput  
559 selection and machine learning techniques have been used to probe the effect of 5' UTR *cis*-  
560 acting elements in these same systems [24,50]. However, working with non-model organisms  
561 such as *P. falciparum* poses unique challenges, such that many of these techniques cannot be  
562 readily utilized for comparative analysis. The highly reductionist approach taken here has the  
563 benefit of allowing specific and systematic hypotheses to be tested, although it is clear that  
564 higher throughput methods will be required to generalize these findings beyond these specific  
565 examples.

566

## 567 **Conclusions**

568 *Cis*-acting features within the 5' UTRs of eukaryotes regulate the TE of a given gene.  
569 While specific examples have previously been evaluated in model eukaryotes, *P. falciparum*

570 possesses unusual 5' UTR characteristics, such as length, base content, and high uAUG  
571 prevalence, that suggest *cis*-acting upstream elements play a significant role in tuning  
572 translational efficiencies. Through extensive dissection of exemplar 5' UTRs from *P. falciparum*,  
573 we measure the individual impacts of each putative element while comparing these same  
574 constructs in human lysates. The impact of these elements was found to be surprisingly similar  
575 in both systems. Since, unlike humans and most other studies eukaryotes, long 5' UTRs  
576 featuring multitudes of uAUGs are common in *P. falciparum*, the precise configuration of these  
577 elements may have evolved to tune translation levels in this organism where other post-  
578 transcriptional regulatory mechanisms may be absent.

579

#### 580 **List of abbreviations**

581 uAUG—upstream “AUG”

582 uORF—upstream open reading frame

583 5' UTR—5' untranslated region

584 TE—translational efficiency

#### 585 **Declarations**

586 Ethics approval and consent to participate

587 Consent for publication

588 Availability of data and material

589 The datasets supporting the conclusions of this article are included within the  
590 article in Supplemental File 4. The TEs and 5' UTR sequences from that data used for  
591 comparative analysis here can be found in Supplemental File 1. The previously published

592 data from Caro, Ah Yong *et. al.* [18] can be found at available at Dryad Digital Repository  
593 under a CC0 Public Domain Dedication: <http://dx.doi.org/10.5061/dryad.vb855>.

#### 594 Competing interests

595 There are no competing interests for any of the authors pertaining to this work.

#### 596 Funding

597 Funding was provided by the Chan Zuckerberg Biohub.

#### 598 Authors' Contributions

599 VEG and JLD conceived and designed this study. VEG performed and executed  
600 the experiments. RD maintained, harvested, and generated *in vitro* translation lysates  
601 for the K562 cells. VEG and JLD drafted and edited this manuscript. All authors read and  
602 approved the submitted manuscript.

#### 603 Acknowledgements

604 We would like to acknowledge the DeRisi lab's Team Malaria for advice,  
605 thoughts, and training. Additionally, we would like to thank Yun Song and Adam Frost  
606 for valuable discussion and comments on the manuscript and Hanna Retallack, Jamin  
607 Lui, Madhura Raghavan, Sara Sunshine, Elze Rackaityte, and Caleigh Mandle-Brehm for  
608 their edits and commentary on the paper.

609

#### 610 References

- 611 1. World Malaria Report 2019 [Internet]. The World Health Organization; 2019. Available from:  
612 <https://www.who.int/publications-detail/world-malaria-report-2019>
- 613 2. Wicht KJ, Mok S, Fidock DA. Molecular Mechanisms of Drug Resistance in Plasmodium  
614 falciparum Malaria. *Annu Rev Microbiol. Annual Reviews*; 2020;74:431–54.

- 615 3. Mathieu LC, Cox H, Early AM, Mok S, Lazrek Y, Paquet J-C, et al. Local emergence in  
616 Amazonia of *Plasmodium falciparum* k13 C580Y mutants associated with in vitro artemisinin  
617 resistance. Soldati-Favre D, Cui L, editors. eLife. eLife Sciences Publications, Ltd;  
618 2020;9:e51015.
- 619 4. Imwong M, Suwannasin K, Kunasol C, Sutawong K, Mayxay M, Rekol H, et al. The spread of  
620 artemisinin-resistant *Plasmodium falciparum* in the Greater Mekong subregion: a molecular  
621 epidemiology observational study. *The Lancet Infectious Diseases*. 2017;17:491–7.
- 622 5. Sheridan CM, Garcia VE, Ah Yong V, DeRisi JL. The *Plasmodium falciparum* cytoplasmic  
623 translation apparatus: a promising therapeutic target not yet exploited by clinically approved  
624 anti-malarials. *Malaria Journal*. 2018;17:465.
- 625 6. Baragaña B, Hallyburton I, Lee MCS, Norcross NR, Grimaldi R, Otto TD, et al. A novel  
626 multiple-stage antimalarial agent that inhibits protein synthesis. *Nature*. 2015;522:315–20.
- 627 7. Saint-Léger A, Sinadinos C, Ribas de Pouplana L. The growing pipeline of natural aminoacyl-  
628 tRNA synthetase inhibitors for malaria treatment. *Bioengineered*. 2016;7:60–4.
- 629 8. Hoepfner D, McNamara CW, Lim CS, Studer C, Riedl R, Aust T, et al. Selective and Specific  
630 Inhibition of the *Plasmodium falciparum* Lysyl-tRNA Synthetase by the Fungal Secondary  
631 Metabolite Cladosporin. *Cell Host Microbe*. 2012;11:654–63.
- 632 9. Zhou J, Huang Z, Zheng L, Hei Z, Wang Z, Yu B, et al. Inhibition of *Plasmodium falciparum*  
633 Lysyl-tRNA synthetase via an anaplastic lymphoma kinase inhibitor. *Nucleic Acids Research*.  
634 2020;48:11566–76.
- 635 10. Ah Yong V, Sheridan CM, Leon KE, Witchley JN, Diep J, DeRisi JL. Identification of  
636 *Plasmodium falciparum* specific translation inhibitors from the MMV Malaria Box using a high  
637 throughput in vitro translation screen. *Malaria Journal*. 2016;15:173.
- 638 11. Sonenberg N, Hinnebusch AG. Regulation of Translation Initiation in Eukaryotes:  
639 Mechanisms and Biological Targets. *Cell*. 2009;136:731–45.
- 640 12. Aylett CHS, Ban N. Eukaryotic aspects of translation initiation brought into focus. *Philos*  
641 *Trans R Soc Lond B Biol Sci*. 2017;372.
- 642 13. Lind C, Åqvist J. Principles of start codon recognition in eukaryotic translation initiation.  
643 *Nucleic Acids Res*. 2016;44:8425–32.
- 644 14. Hinnebusch AG. Structural Insights into the Mechanism of Scanning and Start Codon  
645 Recognition in Eukaryotic Translation Initiation. *Trends Biochem Sci*. 2017;42:589–611.
- 646 15. Thakur A, Gaikwad S, Vijjamarri AK, Hinnebusch AG. eIF2 $\alpha$  interactions with mRNA  
647 control accurate start codon selection by the translation preinitiation complex. *Nucleic Acids*  
648 *Res*. 2020;48:10280–96.

- 649 16. Vilela C, McCarthy JEG. Regulation of fungal gene expression via short open reading frames  
650 in the mRNA 5' untranslated region. *Mol Microbiol.* 2003;49:859–67.
- 651 17. Calvo SE, Pagliarini DJ, Mootha VK. Upstream open reading frames cause widespread  
652 reduction of protein expression and are polymorphic among humans. *Proc Natl Acad Sci U S A.*  
653 2009;106:7507–12.
- 654 18. Caro F, Ah Yong V, Betegon M, DeRisi JL. Genome-wide regulatory dynamics of translation  
655 in the *Plasmodium falciparum* asexual blood stages. Gingeras TR, editor. *eLife.* eLife Sciences  
656 Publications, Ltd; 2014;3:e04106.
- 657 19. Zhang H, Wang Y, Lu J. Function and Evolution of Upstream ORFs in Eukaryotes. *Trends in*  
658 *Biochemical Sciences.* 2019;44:782–94.
- 659 20. Kozak M. Selection of initiation sites by eucaryotic ribosomes: effect of inserting AUG  
660 triplets upstream from the coding sequence for preproinsulin. *Nucleic Acids Res.* 1984;12:3873–  
661 93.
- 662 21. Alghoul F, Laure S, Eriani G, Martin F. Translation inhibitory elements from *Hoxa3* and  
663 *Hoxa11* mRNAs use uORFs for translation inhibition. Sonenberg N, Manley JL, editors. *eLife.*  
664 eLife Sciences Publications, Ltd; 2021;10:e66369.
- 665 22. Hinnebusch AG. Gene-specific translational control of the yeast *GCN4* gene by  
666 phosphorylation of eukaryotic initiation factor 2. *Mol Microbiol.* 1993;10:215–23.
- 667 23. Gunišová S, Beznosková P, Mohammad MP, Vlčková V, Valášek LS. In-depth analysis of  
668 cis-determinants that either promote or inhibit reinitiation on *GCN4* mRNA after translation of  
669 its four short uORFs. *RNA.* 2016;22:542–58.
- 670 24. Cuperus JT, Groves B, Kuchina A, Rosenberg AB, Jojic N, Fields S, et al. Deep learning of  
671 the regulatory grammar of yeast 5' untranslated regions from 500,000 random sequences.  
672 *Genome Res.* 2017;27:2015–24.
- 673 25. Shaw PJ, Ponmee N, Karoonuthaisiri N, Kamchonwongpaisan S, Yuthavong Y.  
674 Characterization of human malaria parasite *Plasmodium falciparum* eIF4E homologue and  
675 mRNA 5' cap status. *Mol Biochem Parasitol.* 2007;155:146–55.
- 676 26. Tuteja R. Identification and bioinformatics characterization of translation initiation complex  
677 eIF4F components and poly(A)-binding protein from *Plasmodium falciparum*. *Commun Integr*  
678 *Biol.* 2009;2:245–60.
- 679 27. Bancells C, Deitsch KW. A molecular switch in the efficiency of translation reinitiation  
680 controls expression of *var2csa*, a gene implicated in pregnancy-associated malaria. *Molecular*  
681 *Microbiology.* 2013;90:472–88.
- 682 28. Kumar M, Srinivas V, Patankar S. Upstream AUGs and upstream ORFs can regulate the  
683 downstream ORF in *Plasmodium falciparum*. *Malar J.* 2015;14:512.

- 684 29. Horrocks P, Wong E, Russell K, Emes RD. Control of gene expression in *Plasmodium*  
685 *falciparum* - ten years on. *Mol Biochem Parasitol.* 2009;164:9–25.
- 686 30. Chappell L, Ross P, Orchard L, Russell TJ, Otto TD, Berriman M, et al. Refining the  
687 transcriptome of the human malaria parasite *Plasmodium falciparum* using amplification-free  
688 RNA-seq. *BMC Genomics* [Internet]. 2020 [cited 2021 Apr 19];21. Available from:  
689 <https://www.ncbi.nlm.nih.gov/pmc/articles/PMC7278070/>
- 690 31. Garcia VE, Liu J, DeRisi JL. Low-Cost Touchscreen Driven Programmable Dual Syringe  
691 Pump for Life Science Applications [Internet]. *Bioengineering*; 2018 Mar. Available from:  
692 <http://biorxiv.org/lookup/doi/10.1101/288290>
- 693 32. Lorenz R, Bernhart SH, Höner Zu Siederdisen C, Tafer H, Flamm C, Stadler PF, et al.  
694 ViennaRNA Package 2.0. *Algorithms Mol Biol.* 2011;6:26.
- 695 33. Saul A, Battistutta D. Analysis of the sequences flanking the translational start sites of  
696 *Plasmodium falciparum*. *Molecular and Biochemical Parasitology.* 1990;42:55–62.
- 697 34. Gardner MJ, Hall N, Fung E, White O, Berriman M, Hyman RW, et al. Genome sequence of  
698 the human malaria parasite *Plasmodium falciparum*. *Nature.* 2002;419:498–511.
- 699 35. Erath J, Djuranovic S, Djuranovic SP. Adaptation of Translational Machinery in Malaria  
700 Parasites to Accommodate Translation of Poly-Adenosine Stretches Throughout Its Life Cycle.  
701 *Front Microbiol* [Internet]. *Frontiers*; 2019 [cited 2021 Jul 27];0. Available from:  
702 <https://www.frontiersin.org/articles/10.3389/fmicb.2019.02823/full>
- 703 36. Pavlovic Djuranovic S, Erath J, Andrews RJ, Bayguinov PO, Chung JJ, Chalker DL, et al.  
704 *Plasmodium falciparum* translational machinery condones polyadenosine repeats. *Sonenberg N,*  
705 *Manley JL, editors. eLife. eLife Sciences Publications, Ltd; 2020;9:e57799.*
- 706 37. Waters AP, Syin C, McCutchan TF. Developmental regulation of stage-specific ribosome  
707 populations in *Plasmodium*. *Nature.* 1989;342:438–40.
- 708 38. Li J, Gutell RR, Damberger SH, Wirtz RA, Kissinger JC, Rogers MJ, et al. Regulation and  
709 trafficking of three distinct 18 S ribosomal RNAs during development of the malaria  
710 parasite 1 | Edited by D. E. Draper. *Journal of Molecular Biology.* 1997;269:203–13.
- 711 39. Kaur C, Kumar M, Patankar S. Messenger RNAs with large numbers of upstream open  
712 reading frames are translated via leaky scanning and reinitiation in the asexual stages of  
713 *Plasmodium falciparum*. *Parasitology.* Cambridge University Press; 2020;147:1100–13.
- 714 40. Amulic B, Salanti A, Lavstsen T, Nielsen MA, Deitsch KW. An Upstream Open Reading  
715 Frame Controls Translation of *var2csa*, a Gene Implicated in Placental Malaria. *PLOS*  
716 *Pathogens.* Public Library of Science; 2009;5:e1000256.
- 717 41. Vembar SS, Droll D, Scherf A. Translational regulation in blood stages of the malaria  
718 parasite *Plasmodium* spp.: systems-wide studies pave the way. *Wiley Interdiscip Rev RNA.*  
719 2016;7:772–92.

- 720 42. Ingolia NT, Ghaemmaghami S, Newman JRS, Weissman JS. Genome-Wide Analysis in  
721 Vivo of Translation with Nucleotide Resolution Using Ribosome Profiling. *Science*. American  
722 Association for the Advancement of Science; 2009;324:218–23.
- 723 43. Brar GA, Weissman JS. Ribosome profiling reveals the what, when, where, and how of  
724 protein synthesis. *Nat Rev Mol Cell Biol*. 2015;16:651–64.
- 725 44. Hinnebusch AG, Lorsch JR. The Mechanism of Eukaryotic Translation Initiation: New  
726 Insights and Challenges. *Cold Spring Harb Perspect Biol*. 2012;4:a011544.
- 727 45. Maag D, Algire MA, Lorsch JR. Communication between Eukaryotic Translation Initiation  
728 Factors 5 and 1A within the Ribosomal Pre-initiation Complex Plays a Role in Start Site  
729 Selection. *Journal of Molecular Biology*. 2006;356:724–37.
- 730 46. Ahyong V, Sheridan CM, Leon KE, Witchley JN, Diep J, DeRisi JL. Identification of  
731 Plasmodium falciparum specific translation inhibitors from the MMV Malaria Box using a high  
732 throughput in vitro translation screen. *Malaria Journal*. 2016;15:173.
- 733 47. Kozak M. Initiation of translation in prokaryotes and eukaryotes. *Gene*. 1999;234:187–208.
- 734 48. Kozak M. Features in the 5' non-coding sequences of rabbit  $\alpha$  and  $\beta$ -globin mRNAs that  
735 affect translational efficiency. *Journal of Molecular Biology*. 1994;235:95–110.
- 736 49. Kozak M. Evaluation of the fidelity of initiation of translation in reticulocyte lysates from  
737 commercial sources. *Nucleic Acids Res*. 1990;18:2828.
- 738 50. Karollus A, Avsec Ž, Gagneur J. Predicting mean ribosome load for 5'UTR of any length  
739 using deep learning. *PLOS Computational Biology*. Public Library of Science;  
740 2021;17:e1008982.

741

## 742 **Figure Legends**

743 Figure 1: Comparison of features within the 5' UTRs of genes in the bottom 10% (n=209) and  
744 top 10% (n=209) of TEs in the late trophozoite stage using data from Caro and Ahyong *et. al.*  
745 2014 [18].

746 a) A histogram of the  $\log_2(\text{TE})$ s of genes expressed in the late trophozoite stage included in  
747 subsequent analysis. The vertical dotted lines indicate the bottom 10% (yellow) and top 10%  
748 (blue) of 5' UTRs.



749 b) The number of uAUGs normalized to the length of the 5' UTRs in the bottom 10% (yellow)  
750 and top 10% (blue) of TEs in the late trophozoite stage. The two distributions are statistically  
751 distinct, KS test-statistic 0.47, p-value  $1.4 \times 10^{-21}$ .

752 c) The average number of uAUGs in the 5' UTRs within a 130-nucleotide window sliding by 5  
753 nucleotides up to 1000 nucleotides of the bottom 10% (yellow) and top 10% blue.

754 d) The distribution of GC content in the bottom 10% (yellow) and top 10% (blue) of TEs in the  
755 late trophozoite stage are statistically distinct, KS test statistic comparison of the two: 0.23 p-  
756 value  $2.24 \times 10^{-5}$ .

757 e) The average GC content within a 130-nucleotides sliding window moving 5 nucleotides up to  
758 1000 nucleotides from the translation start site. Bottom 10% (yellow) and top 10% blue.

759  
760 Supplemental Figure 1: Further comparison of 5' UTR features of genes in the bottom 10% and  
761 top 10% of TEs in the late trophozoite stage using data from Caro and Ahyong *et. al.* 2014 [18].

762 a) Distributions of the 5' UTR lengths from genes with high (blue) or low (yellow) TE. KS test  
763 statistic comparison of the two: 0.12 p-value 0.1

764 b) Distributions of the total number of uAUGs in the 5' UTRs from genes with high (blue) or low  
765 (yellow) TE. KS test statistic comparison of the two: 0.31 p-value  $1.5 \times 10^{-5}$ .

766  
767 Figure 2: 130 nucleotides of the 5' UTR from a translationally active (PF3D7\_1428300) and  
768 repressed gene (PF3D7\_1411400) were sufficient to drive distinct TE.

769 a) The diagrammed sequence of the full length 5' UTRs from active PF3D7\_1428300 and  
770 repressed PF3D7\_1411400. uAUGs are marked by green triangles with the different shades

771 representing the three frames. The numbers between the two construct diagrams mark  
772 distance from the protein coding region.

773 b) The lengths, uAUG count, uORF count, GC content, and translational efficiency (TE) for the  
774 chosen 5' UTRs and genes obtained from the previously published ribosome profiling and  
775 mRNA sequencing [18] with the raw luminescence signal (PF RLU) produced by these 5' UTRs  
776 driving NanoLuc (Promega) expression using *P. falciparum* *in vitro* translation.

777 c)  $\log_{10}$ (luminescence) from NanoLuc produced by 5' UTRs of decreasing length in *P. falciparum*  
778 lysates (red) and K562 lysates (grey). The different lengths were generated by shorting the 5'  
779 UTRs from the 5' end.

780 d) Sequence comparison of the 130 nucleotides closest to the protein coding region of the 5'  
781 UTRs from PF3D7\_1411400 (R[WT]) and PF3D7\_1428300 (A[WT]). The four uAUGs in R[WT] are  
782 labeled with the green triangles. uAUGs without in-frame stops are followed by a dotted line  
783 while uORF forming uAUGs are followed by a solid line with the stop is marked by a vertical  
784 line. The four uAUGs are labeled 1-4 based on their distance from the protein coding start site.

785

786 Supplemental Figure 2: The raw luminescence signal from capped and uncapped RNAs in *P.*  
787 *falciparum* and K562 *in vitro* translation.

788 Figure 3: Dissecting the effects of the four uAUGs in R[WT]. uAUGs were found to have a  
789 generally repressive effect on TE that can be dependent on the presence each other. Graphed  
790 for each is the average and SEM of  $\log_2$ (each experimental value normalized to experimental  
791 R[WT] mean). The dotted line marks the average  $\log_2$ (R[ $\Delta$ 1 $\Delta$ 2 $\Delta$ 3 $\Delta$ 4] normalized to R[WT]). For

792 each figure, to the left is a diagram of the sequences using the same annotations as Figure 2C.

793 To the right of the diagrams are the results for *P. falciparum* and human K562s.

794 a) The effect of removing all four uAUGs from R[WT].

795 b) The effect of retaining a single uAUG

796 c) The effect of removing each uAUG individually

797 d) The effect of removing two uAUGs in combination

798

799 Supplemental Figure 3: The 4 uAUGs from R[WT] exchanged into A[WT] at the same positions

800 showing that the repressive effect is conferrable to other contexts. Graphed for each is the

801 average and SEM of  $\log_2$ (each experimental value normalized to the experimental average of

802 A[WT]).

803

804 Supplemental Figure 4: Predicted repressive effect of combinations of the uAUGs in R[WT]

805 based on their individual activities for a) *P. falciparum* and b) K562.

806

807 Figure 4: Effect of equally spaced and out of frame, non-terminated uAUGs or uORFs on TE

808 a) Sequence diagram of the two cassettes inserted into R[ $\Delta 1:\Delta 2:\Delta 3:\Delta 4$ ] at 5 different positions.

809 The green arrows mark the uAUGs, the solid line indicates the length of the uORF, and the

810 dotted line marks the sequence downstream of the non-terminated uAUG

811 b) The sequence diagrams to the left represent the 5' UTRs containing the uORF cassette. To

812 the right the uORF cassette and the non-terminated cassette are presented side by side. The

813 left set is from *P. falciparum* lysates while the right is from human. Graphed for each is the  
814 average and SEM of  $\log_2(\text{each experimental value} / \text{experimental mean of R}[\Delta 1:\Delta 2:\Delta 3:\Delta 4])$ .

815  
816 Supplemental figure 5: To eliminate all downstream stop sites for moving the out of frame non-  
817 terminated uAUG, 6-point mutations had to be added to the 5' UTR. R $[\Delta 1:\Delta 2:\Delta 4]^*$  was made  
818 with those point mutations to compare to R $[\Delta 1:\Delta 2:\Delta 4]$ . Graphed for each is the average and  
819 SEM of  $\log_2(\text{each triplicate value} / \text{average of R}[\Delta 1:\Delta 2:\Delta 3:\Delta 4] \text{ experimental triplicates})$

820  
821 Figure 5: Evaluating the effect of GC content on translation

822 a) Increasing GC content in A[WT]. Graphed for each is the average and SEM of  $\log_2(\text{each}$   
823  $\text{experimental value} / \text{experimental mean of A[WT]})$

824 b) eliminating GC content in R $[\Delta 1:\Delta 2:\Delta 3:\Delta 4]$ . Graphed for each is the average and SEM of  
825  $\log_2(\text{each experimental value} / \text{experimental mean of R}[\Delta 1:\Delta 2:\Delta 3:\Delta 4])$

826  
827 Supplemental figure 6: The predicted free energy of the secondary structure with in a 30-  
828 nucleotide sliding window moved by 1 nucleotide across the 5' UTRs used to evaluate the effect  
829 of GC content.

830 Figure 6: Evaluating the effects of the ends of the 5' UTRs on translation

831 a) Swapping the 3' end of R[WT] into A[WT] Graphed for each is the average and SEM of  
832  $\log_2(\text{each experimental value} / \text{mean experimental A[WT]})$

833 b) swapping the 3' end of A[WT] into R[WT]. Graphed for each is the average and SEM of  
834  $\log_2(\text{each experimental value} / \text{mean experimental R[WT]})$

835 c) swapping the 5' end of R[Δ1:Δ2:Δ3:Δ4] into A[WT]. Graphed for each is the average and SEM  
836 of  $\log_2(\text{each experimental value} / \text{mean experimental of A[WT]})$   
837 d) swapping the 5' end of A[WT] into R[WT]. Graphed for each is the average and SEM of  
838  $\log_2(\text{each experimental value} / \text{mean experimental R}[\Delta 1:\Delta 2:\Delta 3:\Delta 4])$ .

839

#### 840 **Additional Files**

841 Additional File 1: 5' UTR analyzed. The data on the 2088 genes used for the analysis in Figure 1  
842 and Supplemental Figure 1, including the 5' UTR sequences used, .xls.

843 Additional File 2: P16 sequence. The plasmid sequence for P16 used to generate new  
844 constructs, .geneious.

845 Additional File 3: 5' UTR sequences. The sequences of all the 5' UTR sequences evaluated in this  
846 manuscript, .fasta.

847 Additional File 4: Figure data. All the raw and processed data used to generate the figures in  
848 this manuscript, .xls.

849 Additional File 5: Figure generating script. The script used to generate the figures within the  
850 manuscript, .py.

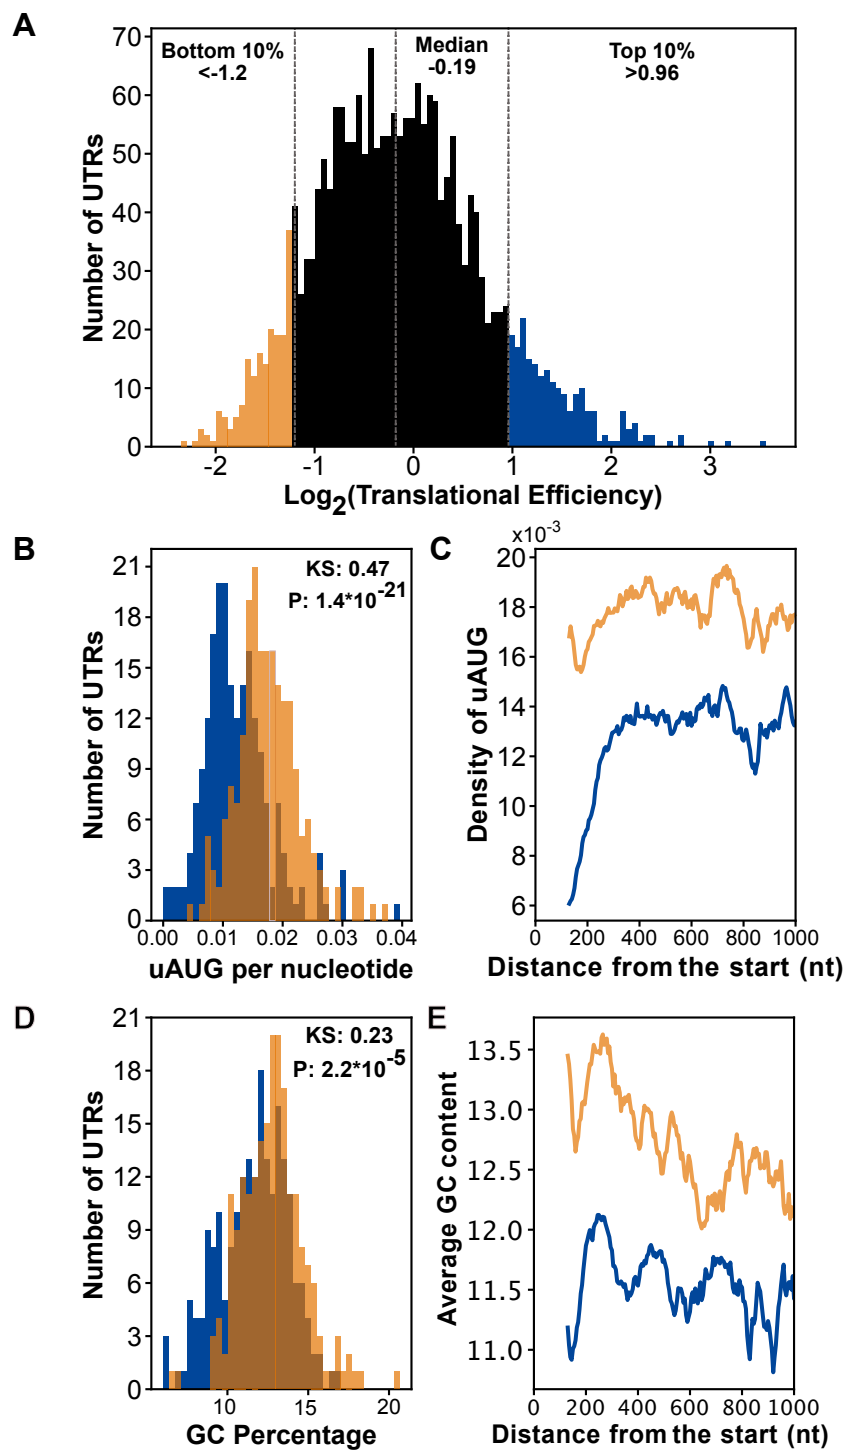

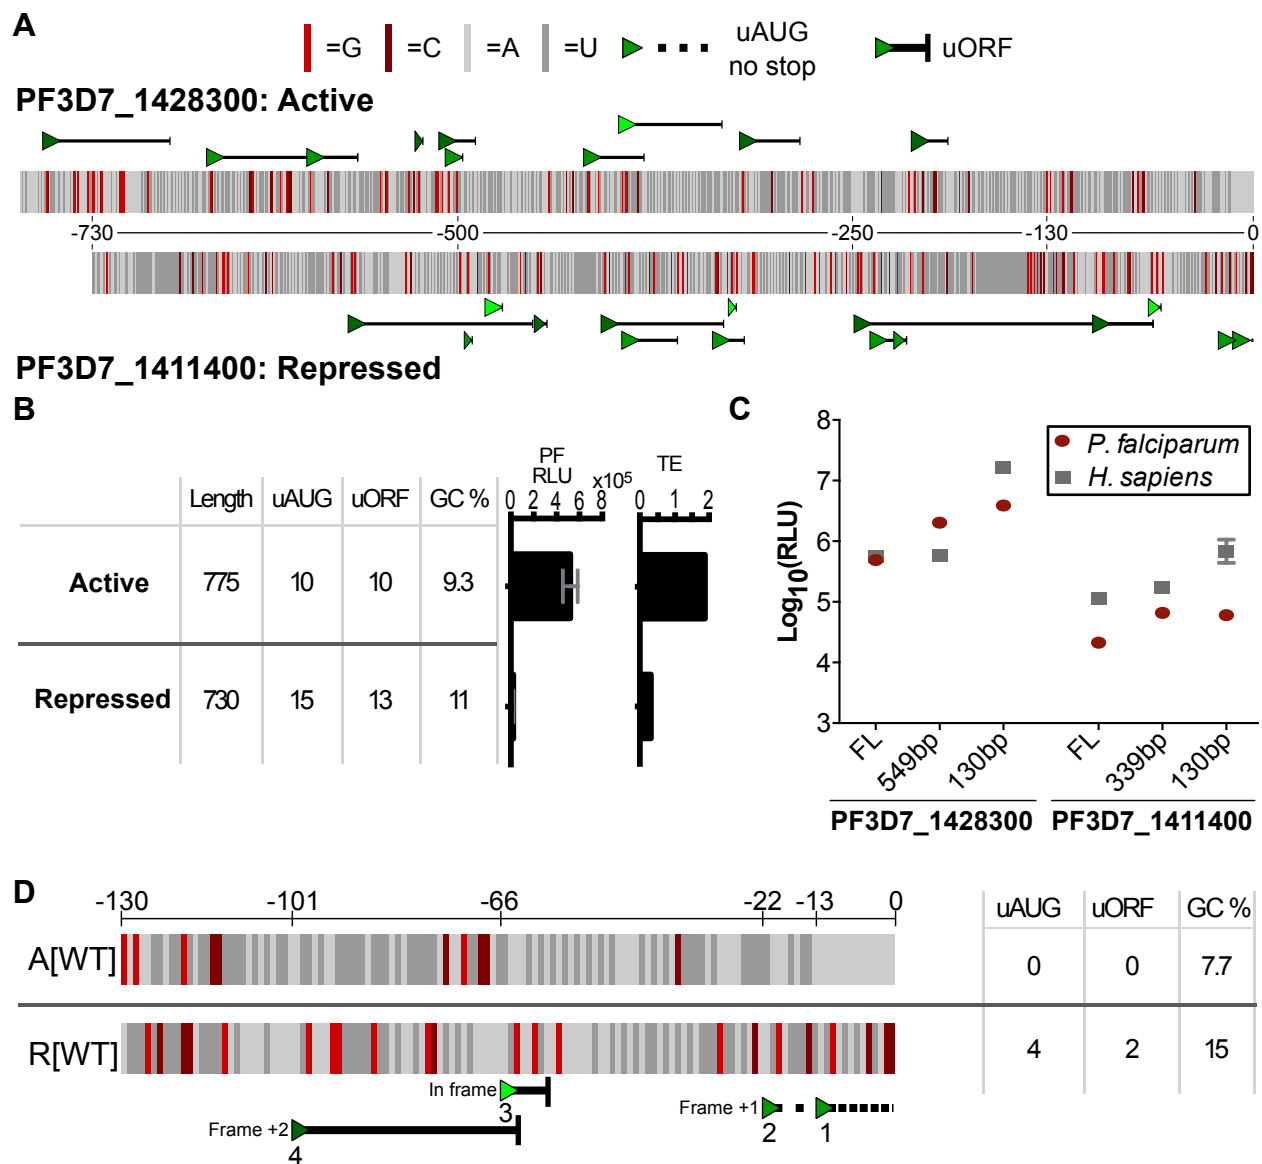

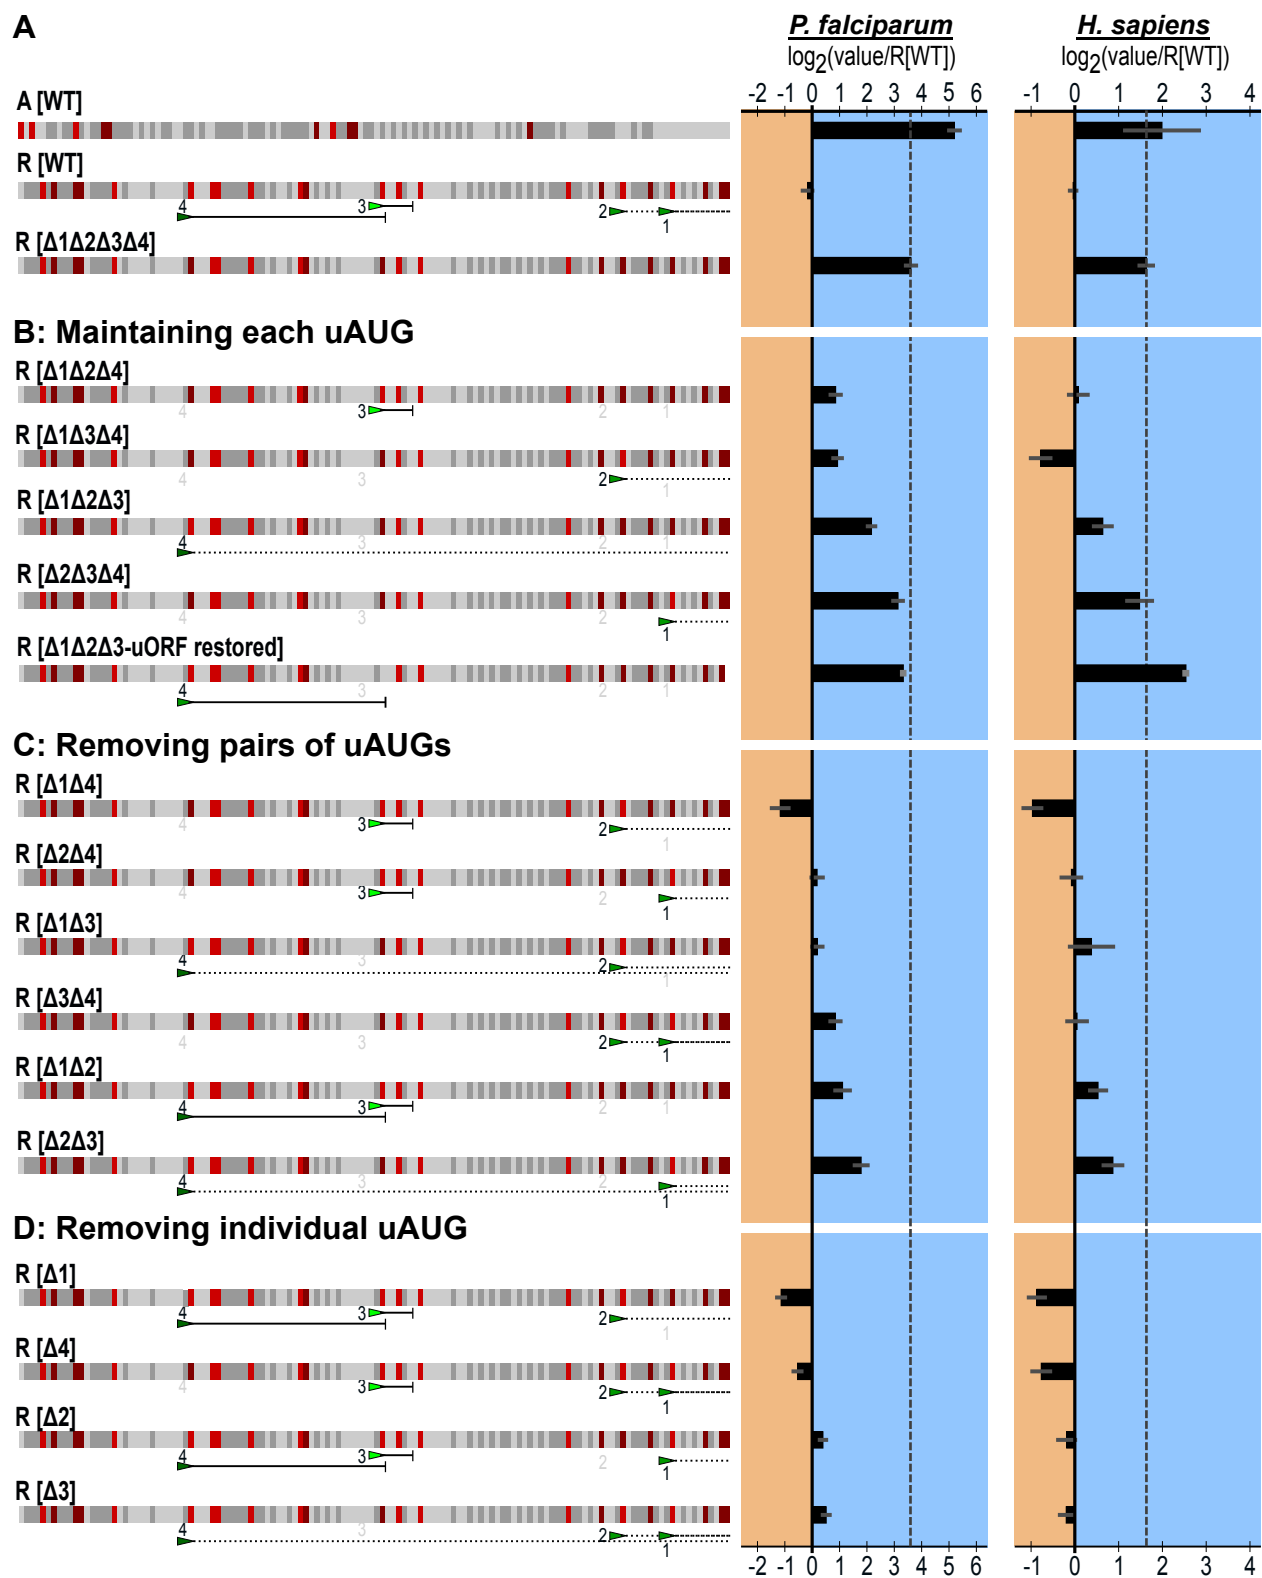



**A**

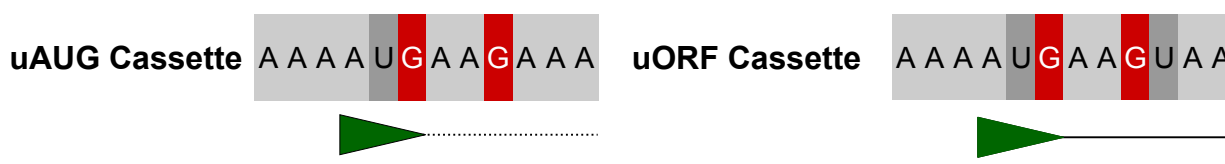

**B**

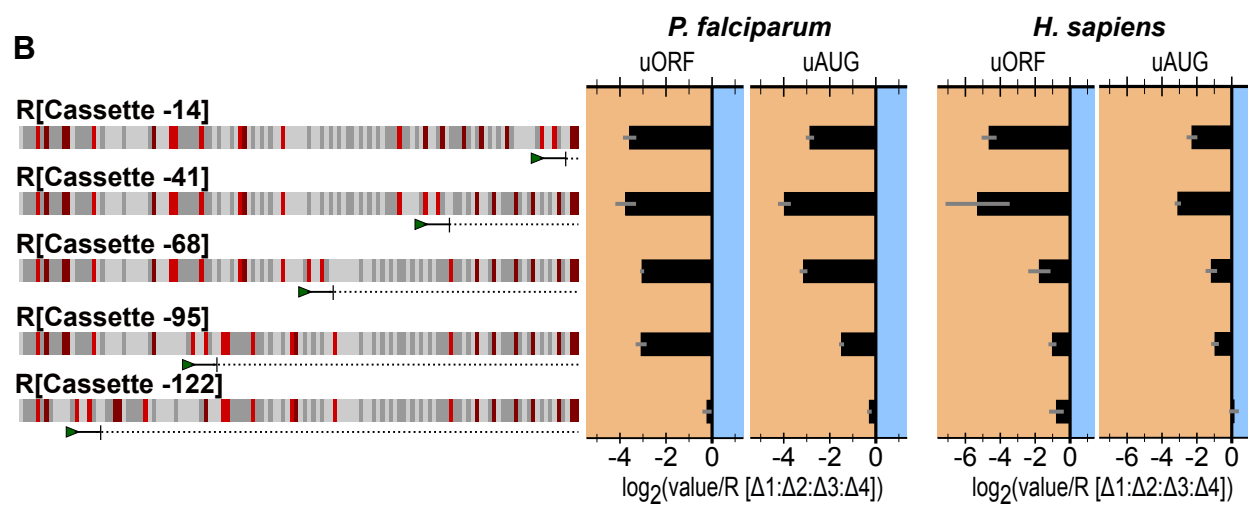

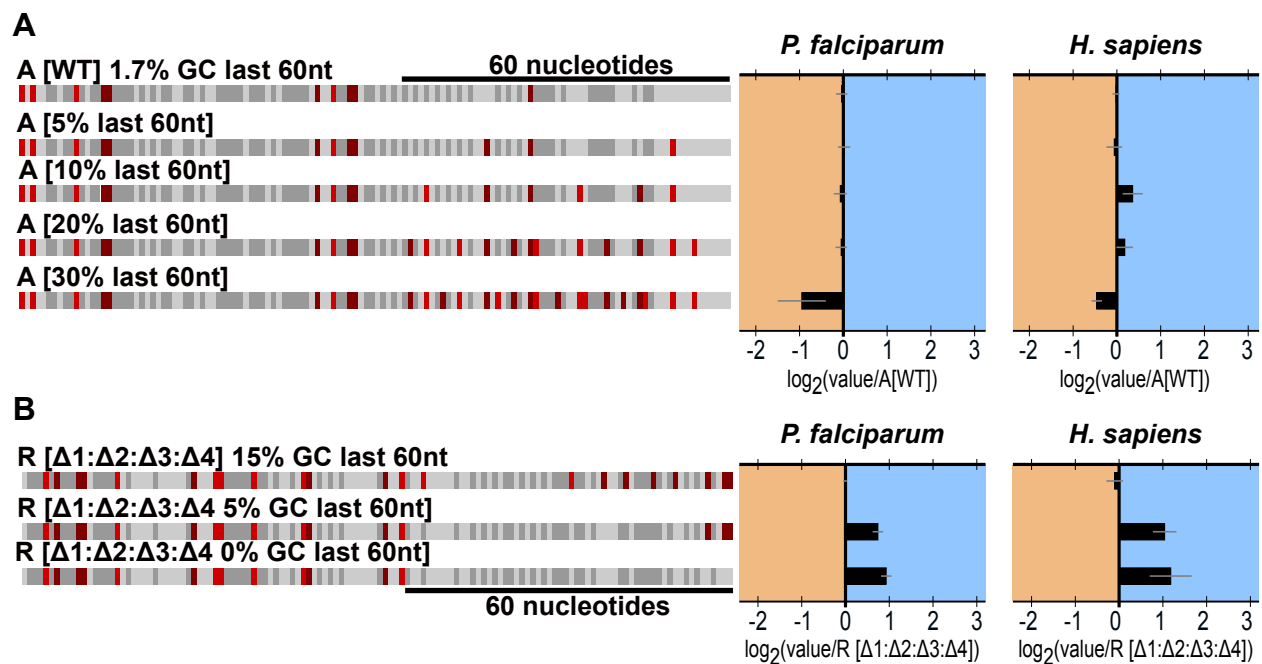

**A) 3' end of R[WT] exchanged into A[WT]**

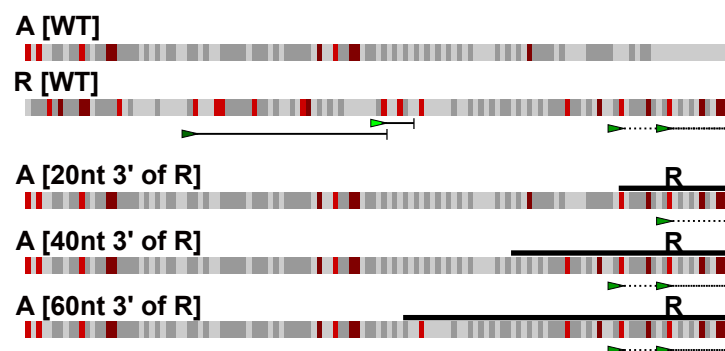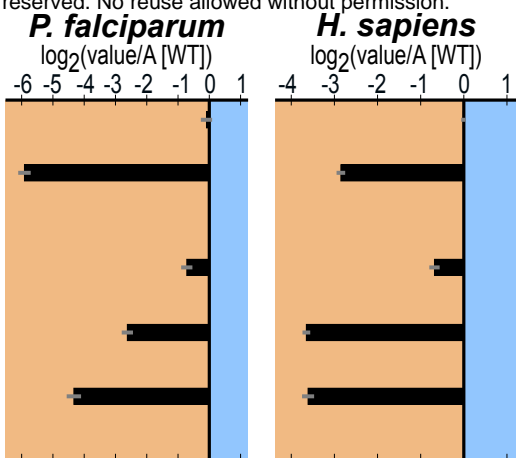

**B) 3' end of A[WT] exchanged into R[WT]**

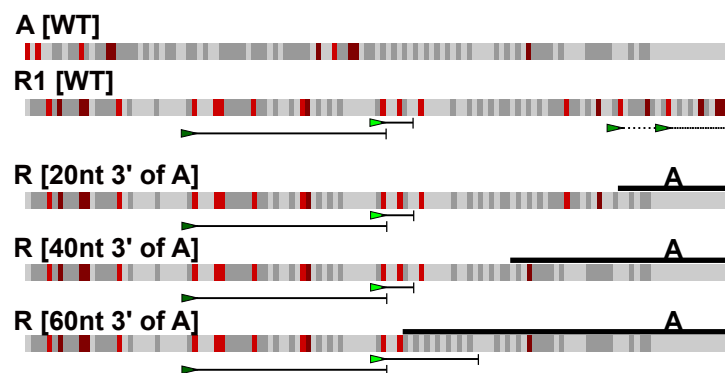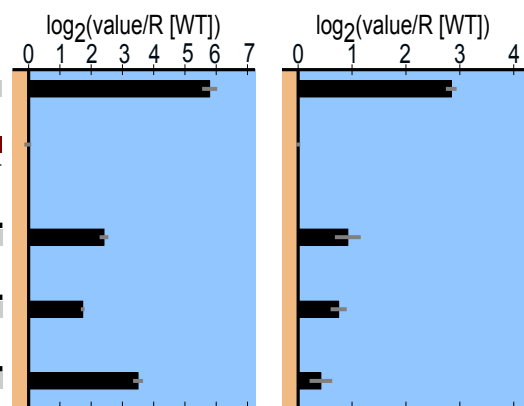

**C) 5' end of R[Δ1:Δ2:Δ3:Δ4] exchanged into A[WT]**

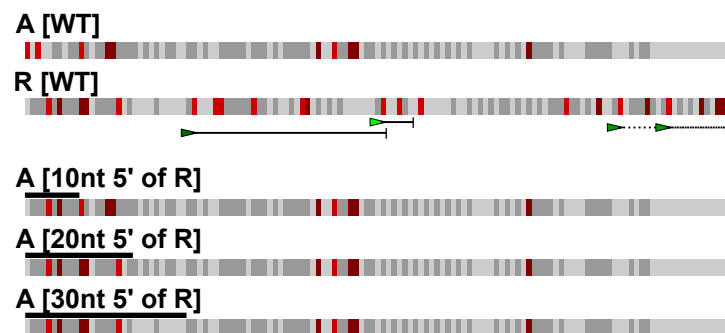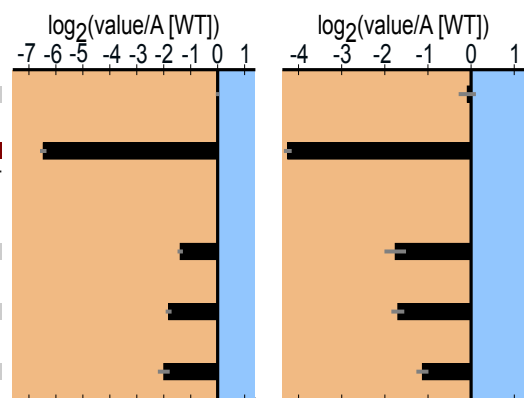

**D) 5' end of A[WT] exchanged into R[Δ1:Δ2:Δ3:Δ4]**

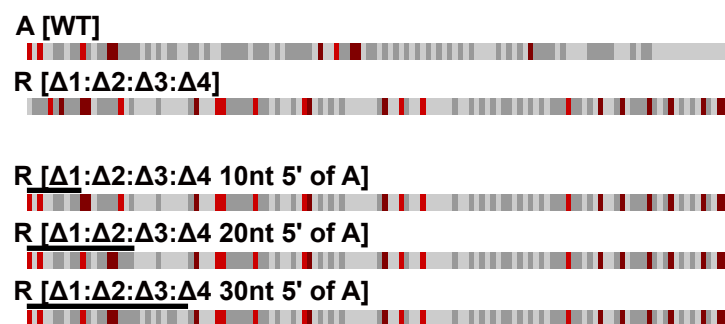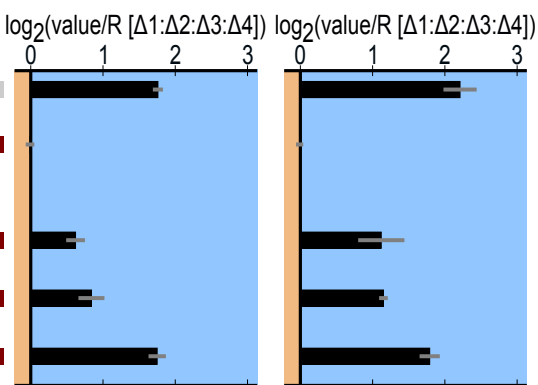

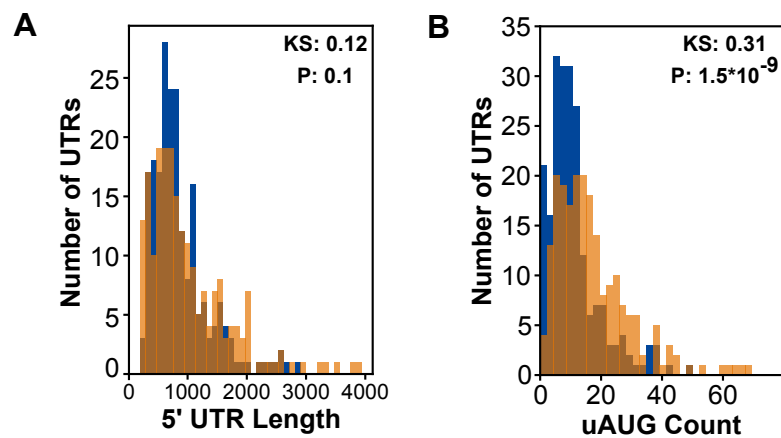

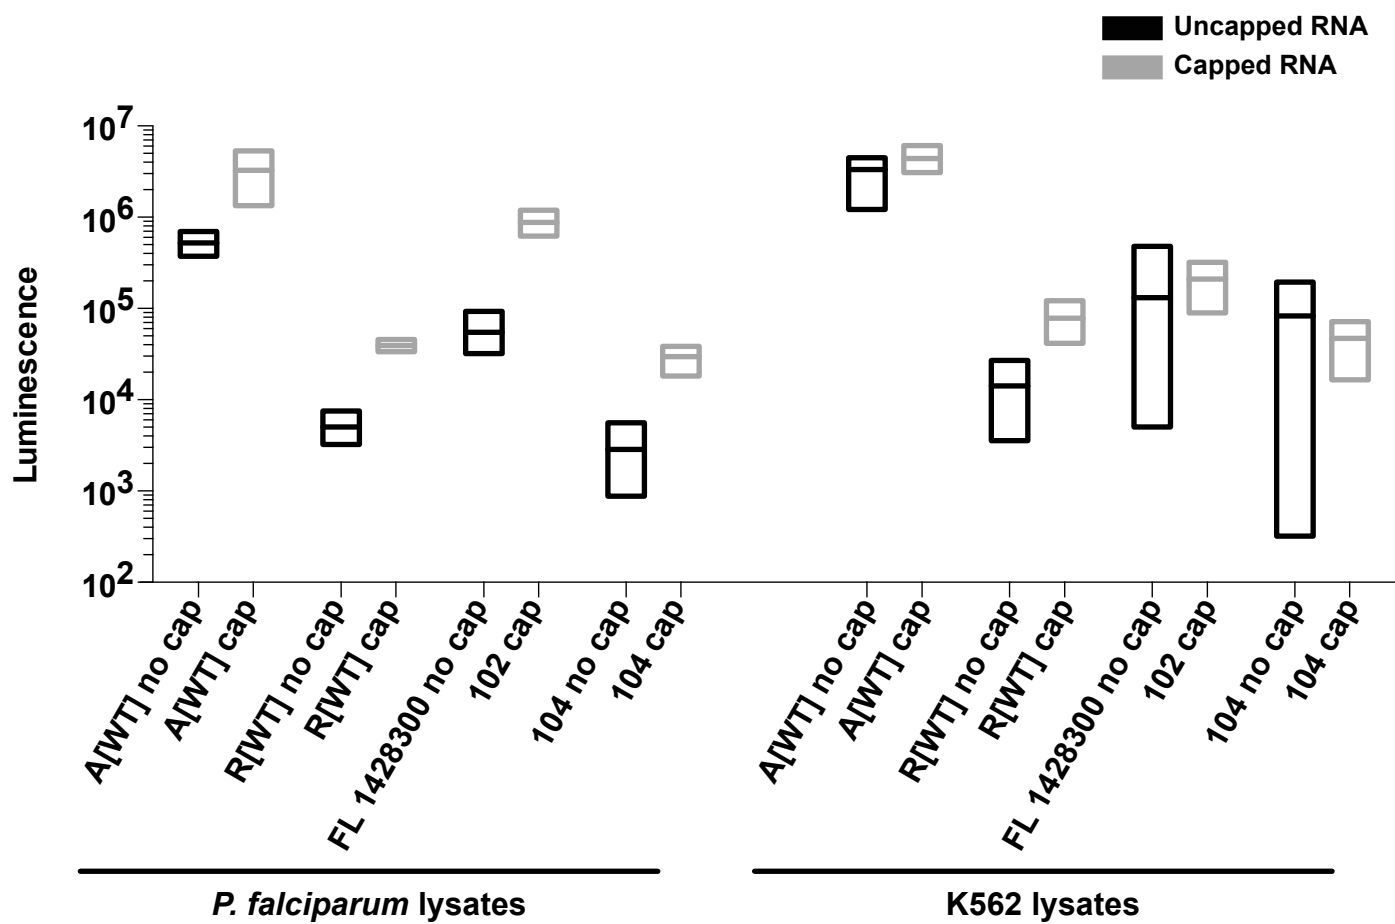

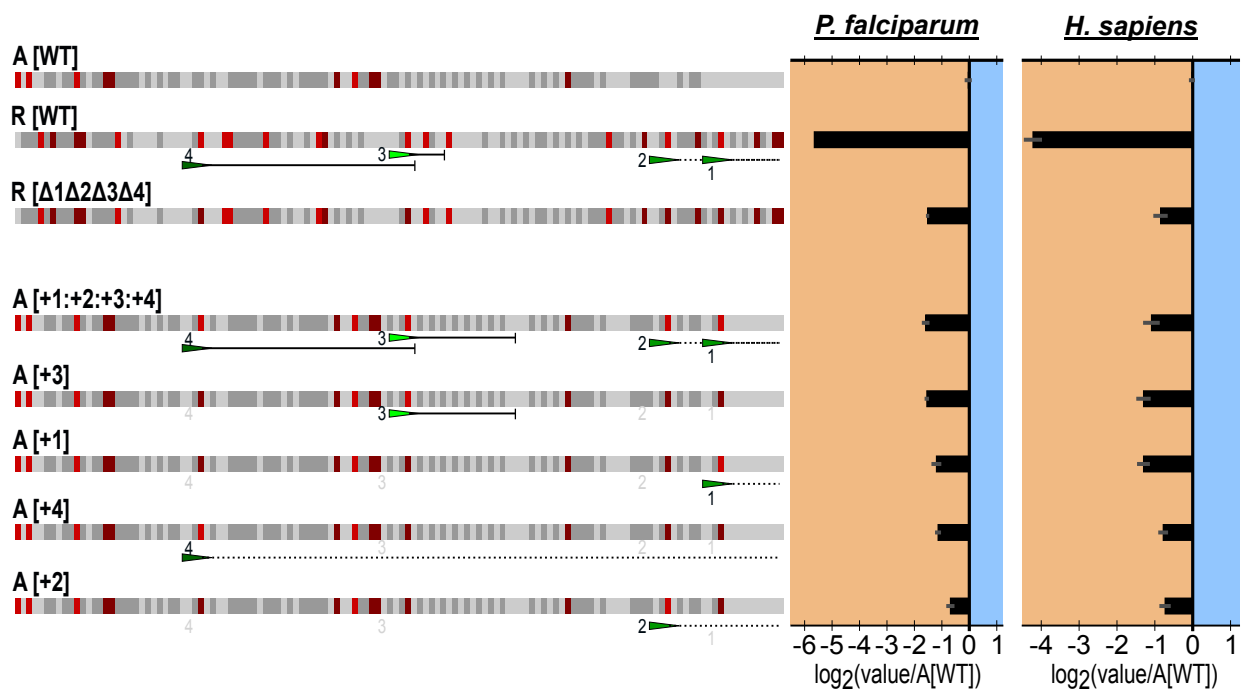

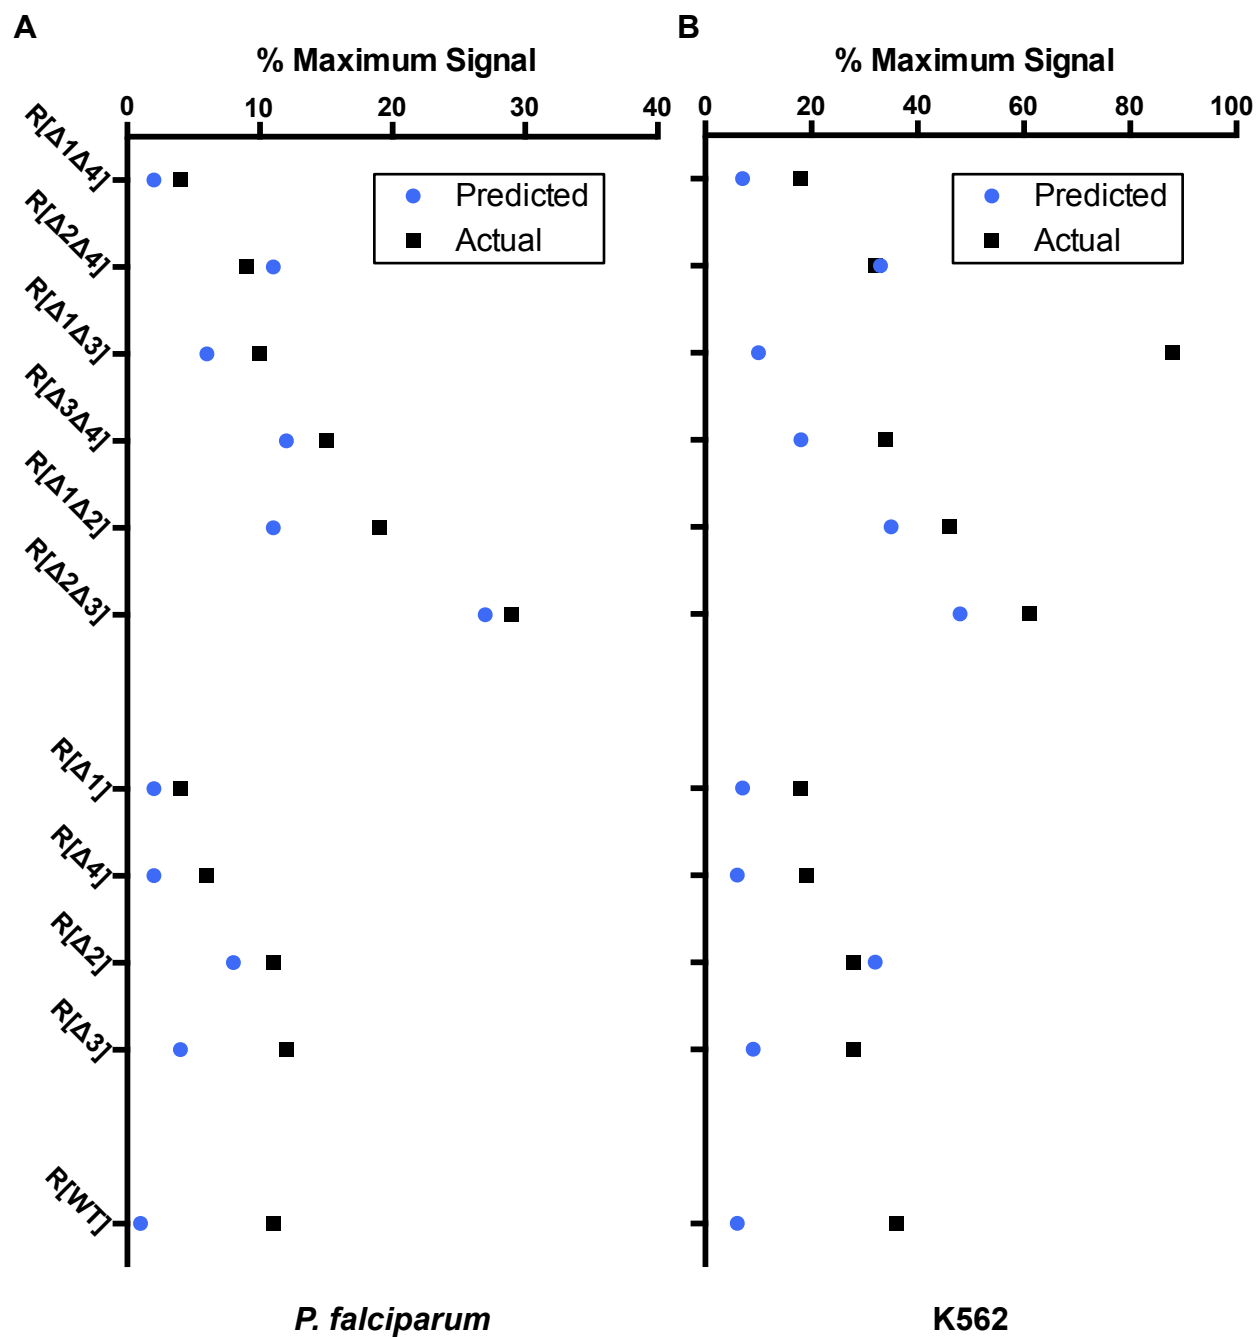

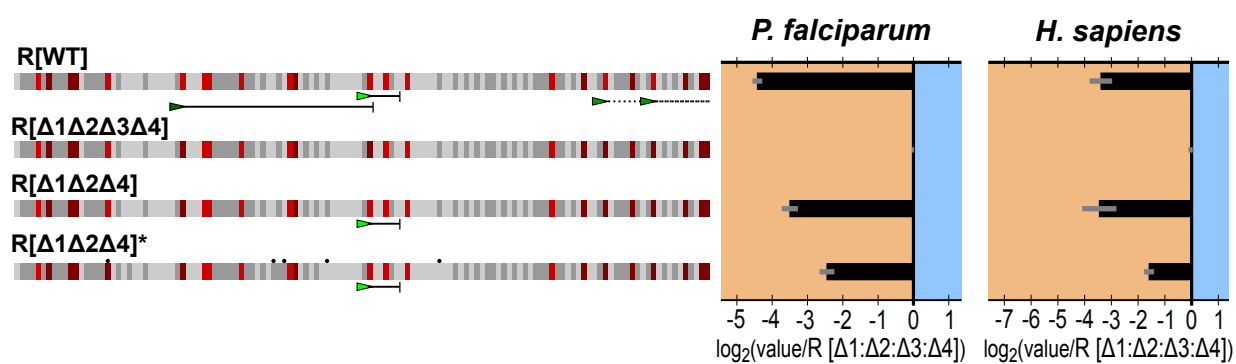



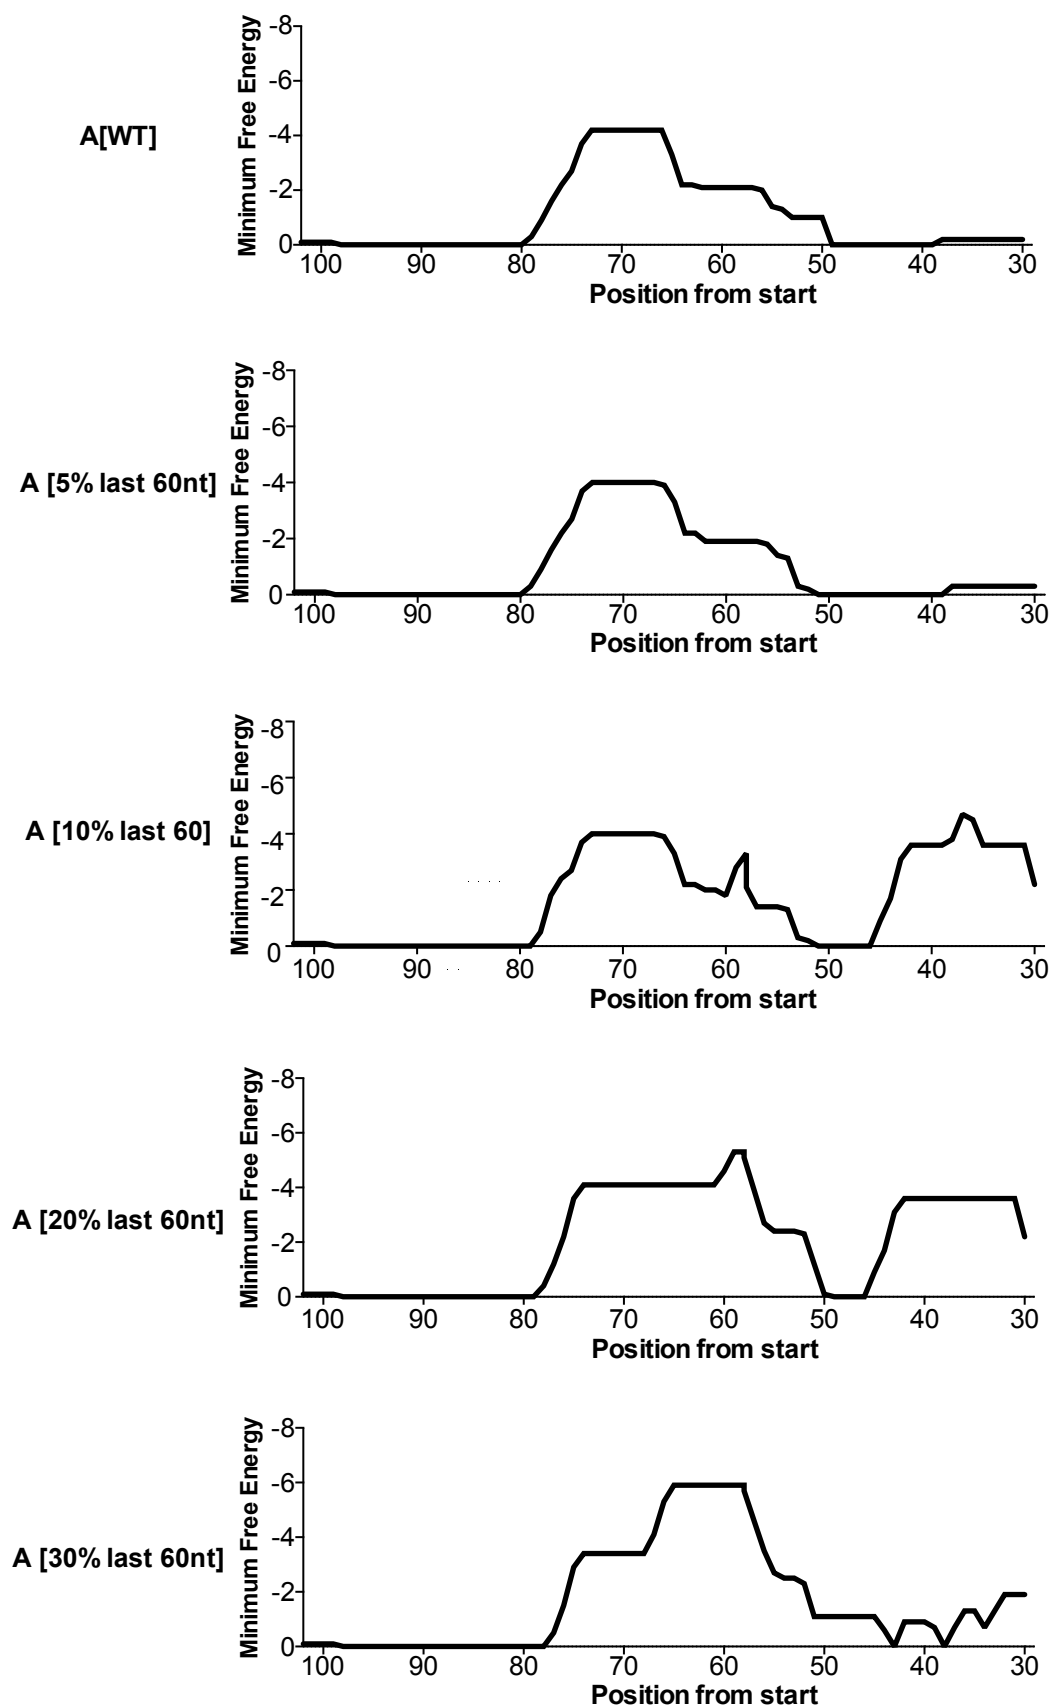

Source: https://www.biorxiv.org/content/10.1101/2021.09.07.459299v2.full.pdf
